# Supplementary material for: Evolution of age-related mutation-driven clonal haematopoiesis over 20 years is associated with metabolic dysfunction in obesity
Source: PubMed Central journal article supplement (PMC10209127; doi:10.1016/j.ebiom.2023.104621), 2023-05-18
Supplement: mmc1.pdf [file mmc1.pdf]

## SUPPLEMENTAL INFORMATION

### Table of contents:

#### Supplemental Methods

Swedish Obese Subjects (SOS) study

*Inclusion and exclusion criteria*

CHDM detection by single-molecule Molecular Inversion probe (smMIP) sequencing

*Sequencing*

*Variant calling*

*Quality control single-timepoint groups*

*Quality control multiple-timepoint group*

Statistical analyses

*Mixed linear model to estimate rate of growth*

#### Supplemental Tables

**Table S1:** Sequenced gene regions

**Table S2** Baseline characteristics of the 40 individuals in the multiple-timepoint usual care group

**Table S3a:** CHDMs identified in the single-timepoint usual care group

**Table S3b:** CHDMs identified in the single-timepoint bariatric surgery group

**Table S4a:** CHDMs in literature – summary of studies used for comparisons shown in Tables S4b-d

**Table S4b:** Overlap of CHDMs in single-timepoint usual care group and CHDMs in literature (shown in Table 3a)

**Table S4c:** Overlap of CHDMs in single-timepoint bariatric surgery group and CHDMs in literature (shown in Table 3a)

**Table S4d:** Overlap of CHDMs in multiple-timepoint usual care group and CHDMs in literature (shown in Table 3a)

**Table S5:** CHDMs identified in the multiple-timepoint usual care group

#### Supplemental Figures

**Figure S1.** smMIP workflow to further boost sensitivity for low-level somatic mutation detection.

**Figure S2.** Trajectory selection flowchart.

**Figure S3.** Categorisation of CHDMs over 20 years.

#### Supplemental References

## Supplemental Methods

### Swedish Obese Subjects (SOS) study

#### *Inclusion and exclusion criteria*

Inclusion and exclusion criteria were identical for all individuals considered for participation in the SOS study. Exclusion criteria were selected to enrol patients who could undergo surgery and the same criteria were applied to the usual care group. Among eligible individuals, individuals electing surgery constituted the surgery group and a contemporaneously matched usual care group was created by an automatic matching program.

Exclusion criteria were earlier operation for gastric or duodenal ulcer, earlier bariatric surgery, gastric ulcer during the past 6 months, ongoing malignancy, active malignancy during the past 5 years, myocardial infarction during the past 6 months, bulimic eating pattern, drug, or alcohol abuse, psychiatric or cooperative problems contraindicating bariatric surgery, other contraindicating conditions (such as continuous glucocorticoid or anti-inflammatory treatment).

### CHDM detection by single-molecule Molecular Inversion probe (smMIP) sequencing

#### *Sequencing*

CHDMs were analysed by ultra-sensitive sequencing, as essentially previously described(1). We modified the existing assay by removing non-CH-related hotspot targets and designing additional double tiling smMIP probes(2) for the entire coding sequence of the most prevalently reported CH-driver gene *DNMT3A*. The final assay consisted of a total of 300 smMIP probes, with 54 nucleotide target sequence per probe, spanning a total of 7612 bases of target sequence (see Supplemental Table S2 for a list of genes, bases and target hotspots covered). smMIP captures were likewise performed with slight modifications: 200-300ng gDNA of each sample with a DNA to smMIP ratio of 1:2,400; all samples were captured twice, and each replicate was tagged with an independent barcode by PCR. Sequencing was performed in batches of up to 380 samples per run by 2x79 basepair PE reads on a high-output run on a NextSeq500 instrument (Illumina) (Supplemental Figure S1a).

#### *Variant calling*

For the purpose of providing true positive somatic variant calls, we applied two independent data processing strategies followed up by targeted quality control, specifically designed for this study (Supplemental Figure S1b).

Here we combine advantages of these two processing strategies:

- 1) Read count and quality check with an openly available software (bwa-mem mapping & mpileups), relying on standardized parameters, and benefitting from genome wide read data mapping that avoid any ambiguity for homologous sequences.
- 2) Consensus calling by sequencing of the UMI tag-groups (utilizing the commercial software JSI Sequence Pilot).

This approach combined the high accuracy of consensus calling (due to the error-correction capability) of CHDM candidates (strategy 1), with complementary information about coverage as well as base and read mapping quality (strategy 2), that cannot easily be retrieved from the proprietary algorithms of JSI Sequence Pilot.

Specifically, FASTQ files were: 1) aligned to the entire reference genome (Hg19) with BWA-MEM(3), and 2) imported into the commercially available NGS software package Sequence Pilot (JSI Medical Systems), using the optimized smMIP analysis module as described previously(4,5). The latter allows for a consensus calling per smMIP probe, enhancing individual variant quality by reducing random PCR or sequencing artefacts, using a majority vote of Unique Molecular Identifier (UMI) duplicates. This also enabled the same molecule to be read with forward and reverse sequencing reads, due to 2x79 basepair reads and a 54 nucleotide insert size of gDNA. Variant calling with Sequence Pilot was performed with the following settings: Minimum combined forward and reverse coverage was set to 10 reads, mutation calling required at least 5 consensus reads (forward and reverse reads considered separately) without a minimal % of variant reads, enabling some somatic calls down to 0.01% (depending on locus specific coverage); consensus calling was done with a minimum of 2 consensus UMI reads and by ignoring consensus read threshold of <30% as 'likely artefacts'; and UMI-tags with "N" bases or low quality were ignored.

#### *Quality control single-timepoint groups*

The resulting variant calls were then subjected to the following stringent quality filtering steps (Supplemental Figure S1c): First, individuals with an average coverage below 500x based on the untargeted aligned BAM files were excluded (STEP1). Second, only variants called in both technical replicates were kept (STEP2). Third, the remaining duplicate variant calls were further filtered by excluding non-coding, synonymous, and likely germline (variant allele frequency (VAF)  $\geq 40\%$ ) variant calls (STEP3). Fourth, variants called in >5% of the individuals that are considered likely run-specific artefacts (excluding most common known drivers) and common smMIP-run artefacts (based on previously processed smMIP-data) were excluded (STEP4). Fifth, remaining variant calls were flagged based on the following characteristics; a) *PTPN11* variants were excluded, due to mapping issues related to homology with various regions in the genome, b) variants with unspecified alternative allele by JSI (N-allele) were excluded, c) variants called in four or more samples with an alternative allele count below 16 when considering forward and reverse reads separately (based on JSI parameters) were excluded, and d) variants called in less than four samples with an alternative allele count below 24 were excluded, and e) based on visual inspection combined with previous validations(1) we flagged likely true positive and likely false positive variants in green and red respectively, excluding all variants with a red flag, overruling any of the previously described flags. Finally, the percentage of alternative alleles for the remaining variant calls was generated using SAMtools mpileup(6) on the untargeted aligned BAM files. Inconclusive mpileups, due to different indexing or complex variant calls, were checked manually, and were excluded if read-end or -start marker was present in the mpileup sequence. The resulting mpileup percentage provided the final VAF for our variant calls and was used in all subsequent analyses.

### *Quality control multiple-timepoint usual care group*

To identify trajectories, i.e., the same clone in 3 or more timepoints in the same individual, we initially relied upon the same stringent variant calling that we used for the single-timepoint measures. Specifically, the data in the multiple-timepoint usual care group was subjected to the same quality filtering pipeline, with exception of the run-specific threshold in STEP3 as multiple timepoints of the same individuals constituted one run. The final output from STEP6 was used to trace CHDM calls per individual over all available timepoints, to allow most sensitive detection of the same CHDMs appearance at previous timepoints. However, as these supplemental mpileups were not initially identified as CHDMs by JSI Medical Systems Sequence Pilot, our two-fold CHDM detection approach is violated. We therefore added a level of stringency to the parsing of multiple-timepoint mpileups in terms of 1) a position-based coverage threshold of  $\geq 500x$ , and 2) a minimum alternative allele count threshold of  $\geq 3$ . For individuals in which we identified a CHDM that was not detected at other timepoints using the stringent calling strategy, we examined the mpileup data for all other timepoints. This allowed tracing of individual clones at additional timepoints, with the thresholds stated above.

### **Statistical analyses**

#### *Mixed linear model to estimate rate of growth*

The growth rate was calculated in R with a mixed linear model using the lme-function and REML method from the nlme package.

R-script:

```
MLM_data = lme(log(VAF) ~ age, random=~age|sampleVariantKey, data=data, method="REML")  
where sampleVariantKey identifies each individual.
```

## Supplemental Tables

**Table S1:** Sequenced gene regions

| <b>Gene</b>   | <b>CHR</b> | <b>BPstart</b> | <b>BPstop</b> | <b>Hotspot(s)</b> |
|---------------|------------|----------------|---------------|-------------------|
| <i>ASXL1</i>  | chr20      | 31021185       | 31021291      | R404; R417        |
| <i>ASXL1</i>  | chr20      | 31022246       | 31022314      | Y591              |
| <i>ASXL1</i>  | chr20      | 31022573       | 31022637      | Y693              |
| <i>ASXL1</i>  | chr20      | 31022891       | 31022956      | Q803              |
| <i>BRAF</i>   | chr7       | 140453103      | 140453168     | V600              |
| <i>BRAF</i>   | chr7       | 140481373      | 140481439     | G469              |
| <i>BRAF</i>   | chr7       | 140494133      | 140494201     | R362              |
| <i>BRCC3</i>  | chrX       | 154305462      | 154305526     | R81               |
| <i>CBL</i>    | chr11      | 119148879      | 119149040     | C381; C396; C404  |
| <i>CBL</i>    | chr11      | 119149194      | 119149295     | F418              |
| <i>DNMT3A</i> | chr2       | 25457097       | 25457337      | R882; F868        |
| <i>DNMT3A</i> | chr2       | 25458534       | 25458737      | W860              |
| <i>DNMT3A</i> | chr2       | 25459766       | 25459898      |                   |
| <i>DNMT3A</i> | chr2       | 25461963       | 25462122      | P777              |
| <i>DNMT3A</i> | chr2       | 25463116       | 25463351      | R771; G762; Y735  |
| <i>DNMT3A</i> | chr2       | 25463462       | 25463661      |                   |
| <i>DNMT3A</i> | chr2       | 25464379       | 25464623      |                   |
| <i>DNMT3A</i> | chr2       | 25466728       | 25466891      |                   |
| <i>DNMT3A</i> | chr2       | 25466975       | 25467236      |                   |
| <i>DNMT3A</i> | chr2       | 25467371       | 25467573      |                   |
| <i>DNMT3A</i> | chr2       | 25468094       | 25468246      |                   |
| <i>DNMT3A</i> | chr2       | 25468860       | 25468966      |                   |
| <i>DNMT3A</i> | chr2       | 25468999       | 25469230      |                   |
| <i>DNMT3A</i> | chr2       | 25469451       | 25469670      |                   |
| <i>DNMT3A</i> | chr2       | 25469890       | 25470072      |                   |
| <i>DNMT3A</i> | chr2       | 25470425       | 25470644      | R326              |
| <i>DNMT3A</i> | chr2       | 25470847       | 25471147      |                   |
| <i>DNMT3A</i> | chr2       | 25497766       | 25497976      |                   |
| <i>DNMT3A</i> | chr2       | 25498336       | 25498443      |                   |
| <i>DNMT3A</i> | chr2       | 25505264       | 25505647      |                   |
| <i>DNMT3A</i> | chr2       | 25522970       | 25523163      |                   |
| <i>DNMT3A</i> | chr2       | 25536724       | 25536884      |                   |
| <i>FGFR2</i>  | chr10      | 123279627      | 123279726     | P253              |
| <i>FGFR3</i>  | chr4       | 1803523        | 1803588       | S249              |
| <i>FGFR3</i>  | chr4       | 1806082        | 1806145       | G380              |
| <i>FGFR3</i>  | chr4       | 1807841        | 1807923       | K650              |
| <i>GNAS</i>   | chr20      | 57484390       | 57484467      | R844              |
| <i>GNBI</i>   | chr1       | 1747219        | 1747281       | K57               |

|               |       |           |           |                  |
|---------------|-------|-----------|-----------|------------------|
| <i>HRAS</i>   | chr11 | 534241    | 534335    | G12              |
| <i>IDH2</i>   | chr15 | 90631915  | 90631981  | R140             |
| <i>JAK2</i>   | chr9  | 5073728   | 5073801   | V617             |
| <i>KRAS</i>   | chr12 | 25398233  | 25398313  | G12              |
| <i>MYD88</i>  | chr3  | 38182285  | 38182347  | L265             |
| <i>MYD88</i>  | chr3  | 38182614  | 38182677  | L273             |
| <i>NRAS</i>   | chr1  | 115256481 | 115256578 | Q61              |
| <i>NRAS</i>   | chr1  | 115258695 | 115258772 | G13              |
| <i>PIK3CA</i> | chr3  | 178916710 | 178916775 | R38              |
| <i>PTEN</i>   | chr10 | 89692869  | 89692955  | R130             |
| <i>PTPN11</i> | chr12 | 112888146 | 112888211 | Y63              |
| <i>SF3B1</i>  | chr2  | 198266793 | 198266879 | K700             |
| <i>SF3B1</i>  | chr2  | 198267310 | 198267375 | K666             |
| <i>SRSF2</i>  | chr17 | 74732933  | 74733004  | P95              |
| <i>STAT3</i>  | chr17 | 40474385  | 40474451  | D661             |
| <i>TET2</i>   | chr4  | 106156676 | 106156762 | L532; R550       |
| <i>TET2</i>   | chr4  | 106157359 | 106157422 | Q764             |
| <i>TET2</i>   | chr4  | 106157586 | 106157655 | H839             |
| <i>TET2</i>   | chr4  | 106157712 | 106157776 | Q888             |
| <i>TP53</i>   | chr17 | 7577460   | 7577612   | I255; G187; R248 |
| <i>TP53</i>   | chr17 | 7578157   | 7578226   | Y220             |
| <i>TP53</i>   | chr17 | 7578374   | 7578461   | R175             |
| <i>TP53</i>   | chr17 | 7579327   | 7579393   | R110             |
| <i>U2AF1</i>  | chr21 | 44524436  | 44524500  | S34              |

**Table S2: Baseline characteristics in the multiple-timepoint usual care group**

|                                                   | <b>Multiple-timepoint usual care</b> |
|---------------------------------------------------|--------------------------------------|
| N                                                 | 40                                   |
| Male sex, n (%)                                   | 9 (22.5)                             |
| Age, yrs (mean (SD))                              | 48.8 (6.2)                           |
| BMI, kg/m <sup>2</sup> (mean (SD))                | 39.0 (3.8)                           |
| Waist to hip-ratio (mean (SD))                    | 0.98 (0.07)                          |
| Plasma glucose, mmol/L (mean (SD))                | 5.44 (2.35)                          |
| Type 2 diabetes <sup>a</sup> , n (%)              | 2 (5.0)                              |
| Insulin, mU/L (mean (SD))                         | 16.8 (9.4)                           |
| HOMA-index, mU/L*mmol/L (mean (SD))               | 4.11 (2.71)                          |
| Total cholesterol, mmol/L (mean (SD))             | 5.79 (1.23)                          |
| HDL-cholesterol, mmol/L (mean (SD))               | 1.34 (0.36)                          |
| LDL-cholesterol <sup>b</sup> , mmol/L (mean (SD)) | 3.36 (1.02)                          |
| Triglycerides, mmol/L (mean (SD))                 | 2.33 (2.96)                          |
| High-sensitive CRP, mg/L (mean (SD))              | 6.51 (4.23)                          |
| Systolic blood pressure, mmHg (mean (SD))         | 137.1 (15.1)                         |
| Diastolic blood pressure, mmHg (mean (SD))        | 84.2 (9.4)                           |
| Hypertension <sup>c</sup> , n (%)                 | 21 (52.5)                            |
| Daily smoker, n (%)                               | 10 (25.0)                            |

a) Based on blood glucose and/or use of anti-diabetes medication

b) Based on Friedewalds equation:

$$LDL\text{-cholesterol} = Total\ cholesterol - (Triglycerides/2.2) - HDL\ cholesterol$$

c) Based on systolic blood pressure  $\geq 140$  or diastolic blood pressure  $\geq 90$  or self-reported use of blood pressure lowering medication

**Table S3a:** CHDMs identified in the single-timepoint usual care group

| ID | Gene name     | Location                  | HGVS c     | HGVS p           | Literature <sup>a</sup> | VAF <sup>b</sup> | Read count <sup>c</sup><br>variant / total |
|----|---------------|---------------------------|------------|------------------|-------------------------|------------------|--------------------------------------------|
| 1  | <i>ASXL1</i>  | chr20:g.31021227_31021228 | c.1226dupA | p.Lys410Glnfs*28 | new LoF<br><i>ASXL1</i> | 1·02             | 19/1814                                    |
| 2  | <i>ASXL1</i>  | chr20:g.31021250          | c.1249C>T  | p.Arg417Ter      | exact                   | 24·11            | 795/3297                                   |
| 3  | <i>ASXL1</i>  | chr20:g.31022277          | c.1762C>T  | p.Gln588Ter      | exact                   | 6·03             | 136/2256                                   |
| 4  | <i>ASXL1</i>  | chr20:g.31022288          | c.1773C>A  | p.Tyr591Ter      | exact                   | 4·50             | 123/2735                                   |
| 5  | <i>ASXL1</i>  | chr20:g.31022592          | c.2077C>T  | p.Arg693Ter      | exact                   | 6·44             | 184/2858                                   |
| 6  | <i>ASXL1</i>  | chr20:g.31022592          | c.2077C>T  | p.Arg693Ter      | exact                   | 0·55             | 26/4731                                    |
| 7  | <i>CBL</i>    | chr11:g.119148964         | c.1184C>T  | p.Pro395Leu      | new                     | 6·32             | 76/1203                                    |
| 7  | <i>DNMT3A</i> | chr2:g.25463190           | c.2303A>G  | p.Asp768Gly      | overlapping             | 0·23             | 18/7965                                    |
| 8  | <i>CBL</i>    | chr11:g.119148991         | c.1211G>A  | p.Cys404Tyr      | exact                   | 0·46             | 20/4314                                    |
| 8  | <i>DNMT3A</i> | chr2:g.25464538           | c.1975C>G  | p.Arg659Gly      | exact                   | 1·40             | 77/5485                                    |
| 9  | <i>CBL</i>    | chr11:g.119148991         | c.1211G>A  | p.Cys404Tyr      | exact                   | 0·29             | 11/3760                                    |
| 9  | <i>GNAS</i>   | chr20:g.57484417          | c.2527T>C  | p.Cys843Arg      | new                     | 0·34             | 15/4476                                    |
| 10 | <i>CBL</i>    | chr11:g.119148991         | c.1211G>A  | p.Cys404Tyr      | exact                   | 11·88            | 354/2979                                   |
| 11 | <i>CBL</i>    | chr11:g.119149241         | c.1249C>G  | p.Pro417Ala      | exact                   | 1·17             | 54/4606                                    |
| 12 | <i>CBL</i>    | chr11:g.119149250         | c.1258C>T  | p.Arg420Ter      | overlapping             | 0·03             | 3/9573                                     |
| 12 | <i>IDH2</i>   | chr15:g.90631934          | c.419G>A   | p.Arg140Gln      | exact                   | 0·06             | 6/9489                                     |
| 13 | <i>CBL</i>    | chr11:g.119149250         | c.1258C>T  | p.Arg420Ter      | overlapping             | 0·01             | 1/9596                                     |
| 13 | <i>GNB1</i>   | chr1:g.1747229            | c.169A>G   | p.Lys57Glu       | exact                   | 1·40             | 133/9501                                   |
| 14 | <i>CBL</i>    | chr11:g.119149251         | c.1259G>A  | p.Arg420Gln      | exact                   | 24·57            | 585/2381                                   |
| 15 | <i>CBL</i>    | chr11:g.119149251         | c.1259G>A  | p.Arg420Gln      | exact                   | 0·16             | 12/7728                                    |
| 16 | <i>DNMT3A</i> | chr2:g.25457155           | c.2732G>A  | p.Cys911Tyr      | exact                   | 1·28             | 19/1481                                    |
| 17 | <i>DNMT3A</i> | chr2:g.25457158           | c.2729C>T  | p.Ala910Val      | exact                   | 0·28             | 12/4246                                    |
| 17 | <i>SF3B1</i>  | chr2:g.198266834          | c.2098A>G  | p.Lys700Glu      | exact                   | 0·30             | 29/9708                                    |
| 18 | <i>DNMT3A</i> | chr2:g.25457158           | c.2729C>T  | p.Ala910Val      | exact                   | 3·04             | 58/1909                                    |
| 19 | <i>DNMT3A</i> | chr2:g.25457165           | c.2722T>G  | p.Tyr908Asp      | exact                   | 5·58             | 281/5032                                   |
| 19 | <i>IDH2</i>   | chr15:g.90631934          | c.419G>A   | p.Arg140Gln      | exact                   | 1·90             | 82/4321                                    |
| 20 | <i>DNMT3A</i> | chr2:g.25463286           | c.2207G>A  | p.Arg736His      | exact                   | 0·66             | 32/4868                                    |
| 20 | <i>DNMT3A</i> | chr2:g.25457242           | c.2645G>A  | p.Arg882His      | exact                   | 0·52             | 38/7344                                    |



|    |               |                          |                      |                  |                          |       |           |
|----|---------------|--------------------------|----------------------|------------------|--------------------------|-------|-----------|
| 20 | <i>DNMT3A</i> | chr2:g.25457171          | c.2716A>T            | p.Lys906Ter      | new LoF<br><i>DNMT3A</i> | 0·34  | 22/6523   |
| 21 | <i>DNMT3A</i> | chr2:g.25457171          | c.2716A>T            | p.Lys906Ter      | new LoF<br><i>DNMT3A</i> | 2·23  | 114/5102  |
| 22 | <i>DNMT3A</i> | chr2:g.25457176          | c.2711C>T            | p.Pro904Leu      | exact                    | 0·65  | 29/4481   |
| 23 | <i>DNMT3A</i> | chr2:g.25457176          | c.2711C>T            | p.Pro904Leu      | exact                    | 0·18  | 9/4956    |
| 24 | <i>DNMT3A</i> | chr2:g.25457176          | c.2711C>T            | p.Pro904Leu      | exact                    | 0·16  | 12/7482   |
| 25 | <i>DNMT3A</i> | chr2:g.25457179_25457182 | c.2705_2708delinsCGG | p.Phe902Serfs*4  | exact                    | 2·06  | 89/4310   |
| 26 | <i>DNMT3A</i> | chr2:g.25463289          | c.2204A>G            | p.Tyr735Cys      | exact                    | 0·19  | 8/4206    |
| 26 | <i>DNMT3A</i> | chr2:g.25457192          | c.2695C>T            | p.Arg899Cys      | exact                    | 0·19  | 8/4270    |
| 27 | <i>DNMT3A</i> | chr2:g.25457231          | c.2656C>T            | p.Gln886Ter      | exact                    | 0·22  | 9/4142    |
| 27 | <i>TP53</i>   | chr17:g.7578410          | c.520A>G             | p.Arg174Gly      | new                      | 0·19  | 11/5671   |
| 28 | <i>DNMT3A</i> | chr2:g.25467433          | c.1643T>C            | p.Met548Thr      | exact                    | 3·28  | 88/2684   |
| 28 | <i>DNMT3A</i> | chr2:g.25457235          | c.2652delG           | p.Arg885Glyfs*21 | new LoF<br><i>DNMT3A</i> | 1·05  | 43/4076   |
| 28 | <i>DNMT3A</i> | chr2:g.25470498          | c.976C>T             | p.Arg326Cys      | exact                    | 0·52  | 22/4249   |
| 29 | <i>DNMT3A</i> | chr2:g.25469525          | c.1243C>T            | p.Gln415Ter      | exact                    | 4·54  | 58/1277   |
| 29 | <i>DNMT3A</i> | chr2:g.25463286          | c.2207G>A            | p.Arg736His      | exact                    | 1·40  | 33/2362   |
| 29 | <i>DNMT3A</i> | chr2:g.25463184          | c.2309C>T            | p.Ser770Leu      | exact                    | 3·10  | 223/7187  |
| 29 | <i>DNMT3A</i> | chr2:g.25457242          | c.2645G>A            | p.Arg882His      | exact                    | 0·42  | 16/3812   |
| 30 | <i>DNMT3A</i> | chr2:g.25470011          | c.1031T>C            | p.Leu344Pro      | exact                    | 1·59  | 49/3087   |
| 30 | <i>DNMT3A</i> | chr2:g.25463190          | c.2303A>G            | p.Asp768Gly      | overlapping              | 0·03  | 3/9827    |
| 30 | <i>DNMT3A</i> | chr2:g.25457249          | c.2638A>G            | p.Met880Val      | exact                    | 0·17  | 11/6545   |
| 30 | <i>DNMT3A</i> | chr2:g.25457242          | c.2645G>A            | p.Arg882His      | exact                    | 0·41  | 27/6508   |
| 31 | <i>DNMT3A</i> | chr2:g.25466767          | c.1936G>A            | p.Gly646Arg      | exact                    | 1·75  | 54/3079   |
| 31 | <i>DNMT3A</i> | chr2:g.25463308          | c.2185C>T            | p.Arg729Trp      | exact                    | 1·04  | 51/4886   |
| 31 | <i>DNMT3A</i> | chr2:g.25457242          | c.2645G>A            | p.Arg882His      | exact                    | 0·43  | 17/3972   |
| 32 | <i>DNMT3A</i> | chr2:g.25463182          | c.2311C>T            | p.Arg771Ter      | exact                    | 9·49  | 570/6005  |
| 32 | <i>DNMT3A</i> | chr2:g.25457242          | c.2645G>A            | p.Arg882His      | exact                    | 3·75  | 120/3202  |
| 33 | <i>DNMT3A</i> | chr2:g.25457242          | c.2645G>A            | p.Arg882His      | exact                    | 23·04 | 1419/6160 |
| 34 | <i>DNMT3A</i> | chr2:g.25457242          | c.2645G>A            | p.Arg882His      | exact                    | 13·06 | 324/2481  |
| 35 | <i>DNMT3A</i> | chr2:g.25457242          | c.2645G>A            | p.Arg882His      | exact                    | 0·90  | 40/4444   |

|    |               |                          |                    |                  |             |       |          |
|----|---------------|--------------------------|--------------------|------------------|-------------|-------|----------|
| 36 | <i>DNMT3A</i> | chr2:g.25457242          | c.2645G>A          | p.Arg882His      | exact       | 0.77  | 33/4292  |
| 37 | <i>DNMT3A</i> | chr2:g.25457242          | c.2645G>A          | p.Arg882His      | exact       | 0.55  | 30/5446  |
| 38 | <i>DNMT3A</i> | chr2:g.25457242          | c.2645G>A          | p.Arg882His      | exact       | 0.42  | 18/4337  |
| 39 | <i>DNMT3A</i> | chr2:g.25466779          | c.1924G>A          | p.Gly642Arg      | overlapping | 3.75  | 207/5525 |
| 39 | <i>DNMT3A</i> | chr2:g.25457243          | c.2644C>T          | p.Arg882Cys      | exact       | 0.76  | 43/5638  |
| 39 | <i>SF3B1</i>  | chr2:g.198266834         | c.2098A>G          | p.Lys700Glu      | exact       | 0.20  | 12/6129  |
| 40 | <i>DNMT3A</i> | chr2:g.25462078          | c.2329C>G          | p.Pro777Ala      | overlapping | 0.60  | 44/7278  |
| 40 | <i>DNMT3A</i> | chr2:g.25457243          | c.2644C>A          | p.Arg882Ser      | exact       | 0.87  | 45/5143  |
| 41 | <i>DNMT3A</i> | chr2:g.25469614          | c.1154delC         | p.Pro385Argfs*22 | exact       | 4.71  | 36/765   |
| 41 | <i>DNMT3A</i> | chr2:g.25457243          | c.2644C>T          | p.Arg882Cys      | exact       | 0.32  | 14/4398  |
| 42 | <i>DNMT3A</i> | chr2:g.25457243          | c.2644C>T          | p.Arg882Cys      | exact       | 21.25 | 797/3750 |
| 43 | <i>DNMT3A</i> | chr2:g.25457243          | c.2644C>T          | p.Arg882Cys      | exact       | 7.21  | 237/3288 |
| 44 | <i>DNMT3A</i> | chr2:g.25457243          | c.2644C>T          | p.Arg882Cys      | exact       | 1.93  | 57/2951  |
| 45 | <i>DNMT3A</i> | chr2:g.25457243          | c.2644C>T          | p.Arg882Cys      | exact       | 0.64  | 21/3266  |
| 46 | <i>DNMT3A</i> | chr2:g.25457243          | c.2644C>A          | p.Arg882Ser      | exact       | 0.57  | 17/2959  |
| 47 | <i>DNMT3A</i> | chr2:g.25457243          | c.2644C>T          | p.Arg882Cys      | exact       | 0.56  | 29/5197  |
| 48 | <i>DNMT3A</i> | chr2:g.25457243          | c.2644C>T          | p.Arg882Cys      | exact       | 0.23  | 11/4855  |
| 49 | <i>DNMT3A</i> | chr2:g.25457249          | c.2638A>G          | p.Met880Val      | exact       | 0.39  | 13/3332  |
| 50 | <i>DNMT3A</i> | chr2:g.25457249          | c.2638A>G          | p.Met880Val      | exact       | 0.18  | 12/6605  |
| 51 | <i>DNMT3A</i> | chr2:g.25457255          | c.2632T>C          | p.Ser878Pro      | exact       | 1.46  | 58/3986  |
| 52 | <i>DNMT3A</i> | chr2:g.25457269          | c.2618A>G          | p.His873Arg      | exact       | 0.25  | 10/4054  |
| 53 | <i>DNMT3A</i> | chr2:g.25463297_25463300 | c.2193_2196delCTTT | p.Phe731Leufs*47 | exact       | 0.86  | 35/4082  |
| 53 | <i>DNMT3A</i> | chr2:g.25458595          | c.2578T>C          | p.Trp860Arg      | exact       | 0.20  | 19/9634  |
| 54 | <i>DNMT3A</i> | chr2:g.25458595          | c.2578T>C          | p.Trp860Arg      | exact       | 0.91  | 89/9791  |
| 55 | <i>DNMT3A</i> | chr2:g.25463302          | c.2191T>C          | p.Phe731Leu      | exact       | 0.23  | 12/5223  |
| 55 | <i>DNMT3A</i> | chr2:g.25458595_25458596 | c.2577dupA         | p.Trp860Metfs*4  | exact       | 0.55  | 41/7507  |
| 56 | <i>DNMT3A</i> | chr2:g.25458595_25458596 | c.2577dupA         | p.Trp860Metfs*4  | exact       | 0.34  | 21/6158  |
| 57 | <i>DNMT3A</i> | chr2:g.25463181          | c.2312G>A          | p.Arg771Gln      | exact       | 0.53  | 52/9837  |
| 57 | <i>DNMT3A</i> | chr2:g.25458604          | c.2569G>T          | p.Asp857Tyr      | overlapping | 0.73  | 50/6860  |
| 58 | <i>DNMT3A</i> | chr2:g.25458656          | c.2517delC         | p.Ile840Ter      | exact       | 9.78  | 382/3905 |

|    |               |                  |            |             |             |       |          |
|----|---------------|------------------|------------|-------------|-------------|-------|----------|
| 59 | <i>DNMT3A</i> | chr2:g.25458684  | c.2489T>C  | p.Val830Ala | overlapping | 1·16  | 61/5261  |
| 59 | <i>GNAS</i>   | chr20:g.57484417 | c.2527T>C  | p.Cys843Arg | new         | 0·22  | 8/3648   |
| 60 | <i>DNMT3A</i> | chr2:g.25463586  | c.2096G>A  | p.Gly699Asp | exact       | 11·36 | 350/3081 |
| 60 | <i>DNMT3A</i> | chr2:g.25459806  | c.2477A>C  | p.Lys826Thr | exact       | 2·27  | 132/5816 |
| 60 | <i>KRAS</i>   | chr12:g.25398279 | c.40G>A    | p.Val14Ile  | exact       | 4·70  | 163/3470 |
| 61 | <i>DNMT3A</i> | chr2:g.25463247  | c.2246G>A  | p.Arg749His | exact       | 7·56  | 43/569   |
| 61 | <i>DNMT3A</i> | chr2:g.25462012  | c.2395C>T  | p.Pro799Ser | exact       | 6·61  | 189/2858 |
| 62 | <i>DNMT3A</i> | chr2:g.25467448  | c.1628G>C  | p.Gly543Ala | exact       | 0·85  | 21/2472  |
| 62 | <i>DNMT3A</i> | chr2:g.25462020  | c.2387G>A  | p.Gly796Asp | exact       | 2·47  | 47/1902  |
| 63 | <i>DNMT3A</i> | chr2:g.25462035  | c.2372C>T  | p.Ala791Val | exact       | 23·25 | 443/1905 |
| 64 | <i>DNMT3A</i> | chr2:g.25463190  | c.2303A>G  | p.Asp768Gly | overlapping | 0·02  | 2/9829   |
| 64 | <i>DNMT3A</i> | chr2:g.25462068  | c.2339T>C  | p.Ile780Thr | exact       | 0·28  | 18/6522  |
| 64 | <i>GNAS</i>   | chr20:g.57484417 | c.2527T>C  | p.Cys843Arg | new         | 0·17  | 10/5880  |
| 64 | <i>IDH2</i>   | chr15:g.90631934 | c.419G>A   | p.Arg140Gln | exact       | 1·04  | 69/6608  |
| 65 | <i>DNMT3A</i> | chr2:g.25462068  | c.2339T>C  | p.Ile780Thr | exact       | 0·51  | 17/3363  |
| 65 | <i>GNB1</i>   | chr1:g.1747229   | c.169A>G   | p.Lys57Glu  | exact       | 3·23  | 191/5917 |
| 66 | <i>DNMT3A</i> | chr2:g.25463289  | c.2204A>G  | p.Tyr735Cys | exact       | 0·70  | 19/2724  |
| 66 | <i>DNMT3A</i> | chr2:g.25462068  | c.2339T>C  | p.Ile780Thr | exact       | 0·36  | 14/3913  |
| 67 | <i>DNMT3A</i> | chr2:g.25463190  | c.2303A>G  | p.Asp768Gly | overlapping | 0·20  | 20/9857  |
| 67 | <i>DNMT3A</i> | chr2:g.25462068  | c.2339T>C  | p.Ile780Thr | exact       | 0·17  | 9/5352   |
| 68 | <i>DNMT3A</i> | chr2:g.25462068  | c.2339T>C  | p.Ile780Thr | exact       | 0·36  | 12/3308  |
| 69 | <i>DNMT3A</i> | chr2:g.25462074  | c.2333T>G  | p.Val778Gly | overlapping | 0·40  | 13/3272  |
| 70 | <i>DNMT3A</i> | chr2:g.25463307  | c.2186G>T  | p.Arg729Leu | exact       | 4·02  | 296/7364 |
| 70 | <i>DNMT3A</i> | chr2:g.25462075  | c.2332delG | p.Val778Ter | exact       | 1·58  | 90/5713  |
| 71 | <i>DNMT3A</i> | chr2:g.25464537  | c.1976G>A  | p.Arg659His | exact       | 0·38  | 10/2664  |
| 71 | <i>DNMT3A</i> | chr2:g.25462077  | c.2330C>T  | p.Pro777Leu | exact       | 0·59  | 22/3758  |
| 72 | <i>DNMT3A</i> | chr2:g.25462077  | c.2330C>T  | p.Pro777Leu | exact       | 0·52  | 13/2489  |
| 73 | <i>DNMT3A</i> | chr2:g.25462078  | c.2329C>G  | p.Pro777Ala | overlapping | 0·26  | 15/5846  |
| 74 | <i>DNMT3A</i> | chr2:g.25463173  | c.2320G>A  | p.Glu774Lys | exact       | 19·22 | 754/3922 |
| 75 | <i>DNMT3A</i> | chr2:g.25463179  | c.2314T>A  | p.Phe772Ile | overlapping | 0·59  | 54/9163  |
| 76 | <i>DNMT3A</i> | chr2:g.25463181  | c.2312G>C  | p.Arg771Pro | exact       | 0·72  | 64/8849  |
| 77 | <i>DNMT3A</i> | chr2:g.25463181  | c.2312G>A  | p.Arg771Gln | exact       | 0·13  | 13/9802  |

|     |               |                          |                                    |                  |                        |      |          |
|-----|---------------|--------------------------|------------------------------------|------------------|------------------------|------|----------|
| 78  | <i>DNMT3A</i> | chr2:g.25464570          | c.1943T>C                          | p.Leu648Pro      | new                    | 0·13 | 10/7905  |
| 78  | <i>DNMT3A</i> | chr2:g.25463182          | c.2311C>T                          | p.Arg771Ter      | exact                  | 0·20 | 20/9781  |
| 78  | <i>TP53</i>   | chr17:g.7578410          | c.520A>G                           | p.Arg174Gly      | new                    | 0·18 | 17/9298  |
| 79  | <i>DNMT3A</i> | chr2:g.25463182          | c.2311C>T                          | p.Arg771Ter      | exact                  | 0·83 | 82/9824  |
| 80  | <i>DNMT3A</i> | chr2:g.25463182          | c.2311C>T                          | p.Arg771Ter      | exact                  | 0·64 | 50/7757  |
| 81  | <i>DNMT3A</i> | chr2:g.25463182          | c.2311C>T                          | p.Arg771Ter      | exact                  | 0·37 | 22/5887  |
| 82  | <i>DNMT3A</i> | chr2:g.25463182          | c.2311C>T                          | p.Arg771Ter      | exact                  | 0·33 | 28/8583  |
| 83  | <i>DNMT3A</i> | chr2:g.25463299          | c.2194T>A                          | p.Phe732Ile      | exact                  | 7·10 | 501/7052 |
| 83  | <i>DNMT3A</i> | chr2:g.25463184          | c.2309C>T                          | p.Ser770Leu      | exact                  | 0·20 | 20/9805  |
| 83  | <i>TET2</i>   | chr4:g.106157653         | c.2617G>T                          | p.Glu873Ter      | new LoF<br><i>TET2</i> | 7·15 | 197/2754 |
| 84  | <i>DNMT3A</i> | chr2:g.25466800          | c.1903C>T                          | p.Arg635Trp      | exact                  | 2·11 | 87/4114  |
| 84  | <i>DNMT3A</i> | chr2:g.25463184          | c.2309C>T                          | p.Ser770Leu      | exact                  | 0·21 | 20/9606  |
| 85  | <i>DNMT3A</i> | chr2:g.25463184          | c.2309C>T                          | p.Ser770Leu      | exact                  | 2·21 | 185/8378 |
| 86  | <i>DNMT3A</i> | chr2:g.25463184          | c.2309C>T                          | p.Ser770Leu      | exact                  | 0·14 | 13/9229  |
| 87  | <i>DNMT3A</i> | chr2:g.25463186          | c.2307C>G                          | p.Ile769Met      | overlapping            | 1·78 | 149/8357 |
| 88  | <i>DNMT3A</i> | chr2:g.25463190          | c.2303A>T                          | p.Asp768Val      | overlapping            | 2·22 | 213/9581 |
| 89  | <i>DNMT3A</i> | chr2:g.25463190          | c.2303A>G                          | p.Asp768Gly      | overlapping            | 0·15 | 15/9817  |
| 90  | <i>DNMT3A</i> | chr2:g.25463190          | c.2303A>G                          | p.Asp768Gly      | overlapping            | 0·14 | 14/9811  |
| 91  | <i>DNMT3A</i> | chr2:g.25463190          | c.2303A>G                          | p.Asp768Gly      | overlapping            | 0·14 | 14/9772  |
| 92  | <i>DNMT3A</i> | chr2:g.25463190          | c.2303A>G                          | p.Asp768Gly      | overlapping            | 0·11 | 11/9851  |
| 93  | <i>DNMT3A</i> | chr2:g.25463190          | c.2303A>G                          | p.Asp768Gly      | overlapping            | 0·03 | 3/9617   |
| 94  | <i>DNMT3A</i> | chr2:g.25463229          | c.2264T>C                          | p.Phe755Ser      | exact                  | 1·06 | 47/4449  |
| 95  | <i>DNMT3A</i> | chr2:g.25463229          | c.2264T>C                          | p.Phe755Ser      | exact                  | 0·39 | 20/5068  |
| 96  | <i>DNMT3A</i> | chr2:g.25463229          | c.2264T>C                          | p.Phe755Ser      | exact                  | 0·30 | 10/3350  |
| 97  | <i>DNMT3A</i> | chr2:g.25463308          | c.2185C>T                          | p.Arg729Trp      | exact                  | 0·44 | 32/7234  |
| 97  | <i>DNMT3A</i> | chr2:g.25463230          | c.2263T>A                          | p.Phe755Ile      | exact                  | 1·81 | 108/5982 |
| 98  | <i>DNMT3A</i> | chr2:g.25463235          | c.2258G>A                          | p.Trp753Ter      | exact                  | 1·65 | 60/3645  |
| 99  | <i>DNMT3A</i> | chr2:g.25463283          | c.2210T>G                          | p.Leu737Arg      | exact                  | 0·86 | 58/6746  |
| 100 | <i>DNMT3A</i> | chr2:g.25463284_25463285 | c.2208 2209insATCACTTTGAGTTCTACCGC | p.Leu737Ilefs*49 | exact                  | 1·38 | 39/2786  |
| 101 | <i>DNMT3A</i> | chr2:g.25463286          | c.2207G>A                          | p.Arg736His      | exact                  | 4·10 | 173/4215 |

|     |               |                          |                   |             |       |       |          |
|-----|---------------|--------------------------|-------------------|-------------|-------|-------|----------|
| 102 | <i>DNMT3A</i> | chr2:g.25463286          | c.2207G>A         | p.Arg736His | exact | 0·67  | 22/3308  |
| 103 | <i>DNMT3A</i> | chr2:g.25463286          | c.2207G>A         | p.Arg736His | exact | 0·63  | 16/2524  |
| 104 | <i>DNMT3A</i> | chr2:g.25467083          | c.1792C>T         | p.Arg598Ter | exact | 0·60  | 14/2337  |
| 104 | <i>DNMT3A</i> | chr2:g.25463287          | c.2206C>G         | p.Arg736Gly | exact | 1·29  | 32/2476  |
| 105 | <i>DNMT3A</i> | chr2:g.25464544          | c.1969G>A         | p.Val657Met | exact | 1·33  | 40/3009  |
| 105 | <i>DNMT3A</i> | chr2:g.25463287          | c.2206C>T         | p.Arg736Cys | exact | 1·04  | 22/2107  |
| 106 | <i>DNMT3A</i> | chr2:g.25463287          | c.2206C>T         | p.Arg736Cys | exact | 24·02 | 955/3976 |
| 107 | <i>DNMT3A</i> | chr2:g.25463287          | c.2206C>T         | p.Arg736Cys | exact | 10·29 | 174/1691 |
| 108 | <i>DNMT3A</i> | chr2:g.25463287          | c.2206C>T         | p.Arg736Cys | exact | 0·65  | 23/3558  |
| 109 | <i>DNMT3A</i> | chr2:g.25463287          | c.2206C>T         | p.Arg736Cys | exact | 0·61  | 21/3463  |
| 110 | <i>DNMT3A</i> | chr2:g.25463287          | c.2206C>G         | p.Arg736Gly | exact | 0·37  | 14/3739  |
| 111 | <i>DNMT3A</i> | chr2:g.25463289          | c.2204A>G         | p.Tyr735Cys | exact | 0·71  | 16/2251  |
| 111 | <i>DNMT3A</i> | chr2:g.25470480          | c.994G>A          | p.Gly332Arg | exact | 0·53  | 16/3020  |
| 112 | <i>DNMT3A</i> | chr2:g.25463289          | c.2204A>C         | p.Tyr735Ser | exact | 1·39  | 23/1660  |
| 113 | <i>DNMT3A</i> | chr2:g.25463289          | c.2204A>G         | p.Tyr735Cys | exact | 1·38  | 31/2254  |
| 114 | <i>DNMT3A</i> | chr2:g.25463289          | c.2204A>G         | p.Tyr735Cys | exact | 0·94  | 31/3288  |
| 115 | <i>DNMT3A</i> | chr2:g.25463289          | c.2204A>G         | p.Tyr735Cys | exact | 0·56  | 16/2840  |
| 116 | <i>DNMT3A</i> | chr2:g.25463289          | c.2204A>G         | p.Tyr735Cys | exact | 0·49  | 14/2837  |
| 117 | <i>DNMT3A</i> | chr2:g.25463289          | c.2204A>G         | p.Tyr735Cys | exact | 0·40  | 9/2256   |
| 118 | <i>DNMT3A</i> | chr2:g.25463289          | c.2204A>G         | p.Tyr735Cys | exact | 0·27  | 11/4058  |
| 119 | <i>DNMT3A</i> | chr2:g.25463296          | c.2197G>T         | p.Glu733Ter | exact | 2·18  | 111/5083 |
| 120 | <i>DNMT3A</i> | chr2:g.25463296_25463297 | c.2196dupT        | p.Glu733Ter | exact | 31·15 | 261/838  |
| 120 | <i>SF3B1</i>  | chr2:g.198266834         | c.2098A>G         | p.Lys700Glu | exact | 3·33  | 290/8719 |
| 121 | <i>DNMT3A</i> | chr2:g.25463296_25463297 | c.2196dupT        | p.Glu733Ter | exact | 0·23  | 8/3485   |
| 122 | <i>DNMT3A</i> | chr2:g.25463298_25463300 | c.2193_2195delCTT | p.Phe732del | exact | 13·21 | 582/4405 |
| 123 | <i>DNMT3A</i> | chr2:g.25463299_25463300 | c.2193_2194delCT  | p.Phe732Ter | exact | 5·95  | 489/8224 |
| 124 | <i>DNMT3A</i> | chr2:g.25463307          | c.2186G>A         | p.Arg729Gln | exact | 0·88  | 60/6800  |
| 125 | <i>DNMT3A</i> | chr2:g.25463308          | c.2185C>T         | p.Arg729Trp | exact | 6·33  | 264/4171 |
| 126 | <i>DNMT3A</i> | chr2:g.25463308          | c.2185C>T         | p.Arg729Trp | exact | 1·10  | 49/4469  |

|     |               |                            |                    |                  |                          |       |          |
|-----|---------------|----------------------------|--------------------|------------------|--------------------------|-------|----------|
| 127 | <i>DNMT3A</i> | chr2:g.25463308            | c.2185C>T          | p.Arg729Trp      | exact                    | 0.58  | 24/4146  |
| 128 | <i>DNMT3A</i> | chr2:g.25463308            | c.2185C>T          | p.Arg729Trp      | exact                    | 0.47  | 31/6556  |
| 129 | <i>DNMT3A</i> | chr2:g.25463308            | c.2185C>T          | p.Arg729Trp      | exact                    | 0.45  | 29/6450  |
| 130 | <i>DNMT3A</i> | chr2:g.25463308            | c.2185C>G          | p.Arg729Gly      | exact                    | 0.40  | 22/5494  |
| 131 | <i>DNMT3A</i> | chr2:g.25463308            | c.2185C>T          | p.Arg729Trp      | exact                    | 0.28  | 21/7616  |
| 132 | <i>DNMT3A</i> | chr2:g.25463308            | c.2185C>T          | p.Arg729Trp      | exact                    | 0.14  | 9/6544   |
| 133 | <i>DNMT3A</i> | chr2:g.25463316            | c.2177G>T          | p.Gly726Val      | exact                    | 2.09  | 49/2348  |
| 134 | <i>DNMT3A</i> | chr2:g.25463536_25463537   | c.2145_2146insTT   | p.Val716Leufs*64 | exact                    | 12.94 | 147/1136 |
| 135 | <i>DNMT3A</i> | chr2:g.25463541            | c.2141C>G          | p.Ser714Cys      | exact                    | 1.55  | 37/2394  |
| 136 | <i>DNMT3A</i> | chr2:g.25463577            | c.2105A>G          | p.Asp702Gly      | overlapping              | 0.90  | 32/3569  |
| 137 | <i>DNMT3A</i> | chr2:g.25463583            | c.2099C>T          | p.Pro700Leu      | exact                    | 0.53  | 10/1880  |
| 138 | <i>DNMT3A</i> | chr2:g.25463584            | c.2098C>A          | p.Pro700Thr      | exact                    | 1.69  | 34/2014  |
| 139 | <i>DNMT3A</i> | chr2:g.25463588            | c.2094G>A          | p.Trp698Ter      | exact                    | 10.14 | 168/1656 |
| 140 | <i>DNMT3A</i> | chr2:g.25464444            | c.2069T>A          | p.Val690Asp      | exact                    | 26.46 | 326/1232 |
| 141 | <i>DNMT3A</i> | chr2:g.25464444            | c.2069T>A          | p.Val690Asp      | exact                    | 17.11 | 468/2735 |
| 142 | <i>DNMT3A</i> | chr2:g.25464534            | c.1979A>G          | p.Tyr660Cys      | exact                    | 0.29  | 15/5137  |
| 143 | <i>DNMT3A</i> | chr2:g.25464537            | c.1976G>A          | p.Arg659His      | exact                    | 0.79  | 43/5414  |
| 144 | <i>DNMT3A</i> | chr2:g.25464540_25464541   | c.1970_1972dupTGG  | p.Val657dup      | overlapping              | 2.22  | 89/4009  |
| 145 | <i>DNMT3A</i> | chr2:g.25468159            | c.1517A>G          | p.His506Arg      | exact                    | 8.78  | 102/1162 |
| 145 | <i>DNMT3A</i> | chr2:g.25464544            | c.1969G>A          | p.Val657Met      | exact                    | 1.57  | 45/2858  |
| 146 | <i>DNMT3A</i> | chr2:g.25464544            | c.1969G>A          | p.Val657Met      | exact                    | 1.40  | 24/1719  |
| 146 | <i>TET2</i>   | chr4:g.106156704_106156707 | c.1668_1671delCAAA | p.Asn556Lysfs*6  | exact                    | 0.68  | 30/4321  |
| 147 | <i>DNMT3A</i> | chr2:g.25464554            | c.1959G>C          | p.Leu653Phe      | exact                    | 1.24  | 42/3394  |
| 148 | <i>DNMT3A</i> | chr2:g.25464574_25464575   | c.1938dupG         | p.Leu647Alafs*21 | exact                    | 1.22  | 116/9530 |
| 149 | <i>DNMT3A</i> | chr2:g.25464575            | c.1938delG         | p.Leu647Serfs*4  | exact                    | 0.69  | 32/4651  |
| 150 | <i>DNMT3A</i> | chr2:g.25466779            | c.1924G>A          | p.Gly642Arg      | overlapping              | 7.30  | 237/3248 |
| 151 | <i>DNMT3A</i> | chr2:g.25470019            | c.1023delT         | p.Glu342Argfs*3  | new LoF<br><i>DNMT3A</i> | 11.89 | 361/3037 |
| 151 | <i>DNMT3A</i> | chr2:g.25466799            | c.1904G>T          | p.Arg635Leu      | exact                    | 3.68  | 126/3424 |

|     |               |                          |            |                  |             |       |          |
|-----|---------------|--------------------------|------------|------------------|-------------|-------|----------|
| 152 | <i>DNMT3A</i> | chr2:g.25466799          | c.1904G>A  | p.Arg635Gln      | exact       | 0·51  | 16/3142  |
| 153 | <i>DNMT3A</i> | chr2:g.25466800          | c.1903C>T  | p.Arg635Trp      | exact       | 0·57  | 15/2640  |
| 153 | <i>JAK2</i>   | chr9:g.5073770           | c.1849G>T  | p.Val617Phe      | exact       | 0·17  | 10/5727  |
| 154 | <i>DNMT3A</i> | chr2:g.25466800          | c.1903C>T  | p.Arg635Trp      | exact       | 0·49  | 15/3060  |
| 155 | <i>DNMT3A</i> | chr2:g.25467083          | c.1792C>T  | p.Arg598Ter      | exact       | 1·66  | 56/3372  |
| 156 | <i>DNMT3A</i> | chr2:g.25467091          | c.1784T>C  | p.Leu595Pro      | exact       | 10·56 | 386/3655 |
| 157 | <i>DNMT3A</i> | chr2:g.25467200          | c.1675delT | p.Cys559Alafs*92 | exact       | 0·43  | 5/1156   |
| 158 | <i>DNMT3A</i> | chr2:g.25467434          | c.1642A>G  | p.Met548Val      | overlapping | 2·00  | 32/1599  |
| 159 | <i>DNMT3A</i> | chr2:g.25467442          | c.1634A>G  | p.Glu545Gly      | overlapping | 2·07  | 49/2365  |
| 160 | <i>DNMT3A</i> | chr2:g.25467449          | c.1627G>T  | p.Gly543Cys      | exact       | 5·98  | 75/1255  |
| 161 | <i>DNMT3A</i> | chr2:g.25469932_25469933 | c.1109dupA | p.Tyr370Ter      | exact       | 0·67  | 18/2683  |
| 162 | <i>DNMT3A</i> | chr2:g.25469945          | c.1097G>C  | p.Arg366Pro      | overlapping | 7·97  | 66/828   |
| 163 | <i>DNMT3A</i> | chr2:g.25470011          | c.1031T>C  | p.Leu344Pro      | exact       | 19·73 | 575/2915 |
| 164 | <i>DNMT3A</i> | chr2:g.25470011          | c.1031T>A  | p.Leu344Gln      | exact       | 1·84  | 42/2278  |
| 165 | <i>DNMT3A</i> | chr2:g.25470011          | c.1031T>C  | p.Leu344Pro      | exact       | 0·55  | 11/2001  |
| 166 | <i>DNMT3A</i> | chr2:g.25470480          | c.994G>A   | p.Gly332Arg      | exact       | 0·44  | 15/3438  |
| 167 | <i>DNMT3A</i> | chr2:g.25470483          | c.991T>A   | p.Phe331Ile      | overlapping | 1·65  | 42/2552  |
| 168 | <i>DNMT3A</i> | chr2:g.25470497          | c.977G>A   | p.Arg326His      | exact       | 0·41  | 17/4126  |
| 168 | <i>DNMT3A</i> | chr2:g.25470484          | c.990G>T   | p.Trp330Cys      | overlapping | 0·37  | 16/4371  |
| 169 | <i>DNMT3A</i> | chr2:g.25470497          | c.977G>A   | p.Arg326His      | exact       | 0·94  | 27/2865  |
| 170 | <i>DNMT3A</i> | chr2:g.25470497          | c.977G>A   | p.Arg326His      | exact       | 0·33  | 9/2709   |
| 171 | <i>DNMT3A</i> | chr2:g.25470498          | c.976C>T   | p.Arg326Cys      | exact       | 11·78 | 486/4125 |
| 172 | <i>DNMT3A</i> | chr2:g.25470498          | c.976C>T   | p.Arg326Cys      | exact       | 1·24  | 44/3542  |
| 173 | <i>DNMT3A</i> | chr2:g.25470516          | c.958C>T   | p.Arg320Ter      | exact       | 2·09  | 118/5646 |
| 174 | <i>DNMT3A</i> | chr2:g.25470533          | c.941G>A   | p.Trp314Ter      | exact       | 2·96  | 18/608   |
| 175 | <i>GNAS</i>   | chr20:g.57484414         | c.2524C>T  | p.Arg842Cys      | new         | 0·07  | 6/9114   |
| 176 | <i>GNAS</i>   | chr20:g.57484414         | c.2524C>T  | p.Arg842Cys      | new         | 0·02  | 2/9727   |
| 177 | <i>GNAS</i>   | chr20:g.57484417         | c.2527T>C  | p.Cys843Arg      | new         | 0·45  | 19/4244  |
| 178 | <i>GNAS</i>   | chr20:g.57484417         | c.2527T>C  | p.Cys843Arg      | new         | 0·37  | 12/3226  |
| 179 | <i>GNAS</i>   | chr20:g.57484417         | c.2527T>C  | p.Cys843Arg      | new         | 0·29  | 12/4124  |
| 180 | <i>GNAS</i>   | chr20:g.57484417         | c.2527T>C  | p.Cys843Arg      | new         | 0·24  | 19/7862  |

|     |              |                            |                    |                  |                        |       |          |
|-----|--------------|----------------------------|--------------------|------------------|------------------------|-------|----------|
| 181 | <i>GNAS</i>  | chr20:g.57484417           | c.2527T>C          | p.Cys843Arg      | new                    | 0.22  | 13/5841  |
| 182 | <i>GNAS</i>  | chr20:g.57484417           | c.2527T>C          | p.Cys843Arg      | new                    | 0.13  | 9/6918   |
| 183 | <i>GNAS</i>  | chr20:g.57484420           | c.2530C>T          | p.Arg844Cys      | exact                  | 0.29  | 14/4815  |
| 184 | <i>GNAS</i>  | chr20:g.57484421           | c.2531G>A          | p.Arg844His      | exact                  | 1.99  | 84/4224  |
| 185 | <i>GNAS</i>  | chr20:g.57484421           | c.2531G>A          | p.Arg844His      | exact                  | 1.90  | 92/4834  |
| 186 | <i>GNAS</i>  | chr20:g.57484421           | c.2531G>A          | p.Arg844His      | exact                  | 1.38  | 54/3904  |
| 187 | <i>GNAS</i>  | chr20:g.57484421           | c.2531G>A          | p.Arg844His      | exact                  | 0.94  | 20/2134  |
| 188 | <i>GNAS</i>  | chr20:g.57484421           | c.2531G>A          | p.Arg844His      | exact                  | 0.31  | 12/3812  |
| 189 | <i>GNAS</i>  | chr20:g.57484421           | c.2531G>A          | p.Arg844His      | exact                  | 0.23  | 22/9712  |
| 190 | <i>GNAS</i>  | chr20:g.57484421           | c.2531G>A          | p.Arg844His      | exact                  | 0.21  | 10/4754  |
| 191 | <i>GNB1</i>  | chr1:g.1747227             | c.171G>T           | p.Lys57Asn       | exact                  | 0.26  | 10/3827  |
| 192 | <i>GNB1</i>  | chr1:g.1747229             | c.169A>G           | p.Lys57Glu       | exact                  | 3.43  | 90/2627  |
| 193 | <i>GNB1</i>  | chr1:g.1747229             | c.169A>G           | p.Lys57Glu       | exact                  | 1.68  | 89/5302  |
| 194 | <i>GNB1</i>  | chr1:g.1747229             | c.169A>G           | p.Lys57Glu       | exact                  | 0.70  | 56/7959  |
| 195 | <i>GNB1</i>  | chr1:g.1747229             | c.169A>G           | p.Lys57Glu       | exact                  | 0.70  | 48/6833  |
| 196 | <i>GNB1</i>  | chr1:g.1747229             | c.169A>G           | p.Lys57Glu       | exact                  | 0.62  | 43/6990  |
| 197 | <i>IDH2</i>  | chr15:g.90631934           | c.419G>A           | p.Arg140Gln      | exact                  | 0.18  | 8/4548   |
| 198 | <i>IDH2</i>  | chr15:g.90631935           | c.418C>T           | p.Arg140Trp      | exact                  | 0.10  | 9/9291   |
| 199 | <i>JAK2</i>  | chr9:g.5073770             | c.1849G>T          | p.Val617Phe      | exact                  | 13.69 | 326/2382 |
| 200 | <i>JAK2</i>  | chr9:g.5073770             | c.1849G>T          | p.Val617Phe      | exact                  | 6.78  | 153/2257 |
| 201 | <i>JAK2</i>  | chr9:g.5073770             | c.1849G>T          | p.Val617Phe      | exact                  | 0.94  | 17/1810  |
| 202 | <i>JAK2</i>  | chr9:g.5073770             | c.1849G>T          | p.Val617Phe      | exact                  | 0.54  | 35/6493  |
| 203 | <i>JAK2</i>  | chr9:g.5073770             | c.1849G>T          | p.Val617Phe      | exact                  | 0.19  | 13/6861  |
| 204 | <i>KRAS</i>  | chr12:g.25398281           | c.38G>A            | p.Gly13Asp       | exact                  | 0.92  | 17/1847  |
| 205 | <i>KRAS</i>  | chr12:g.25398284           | c.35G>A            | p.Gly12Asp       | exact                  | 0.33  | 32/9618  |
| 206 | <i>SF3B1</i> | chr2:g.198266834           | c.2098A>G          | p.Lys700Glu      | exact                  | 5.48  | 148/2699 |
| 207 | <i>STAT3</i> | chr17:g.40474420           | c.1981G>T          | p.Asp661Tyr      | exact                  | 1.36  | 44/3230  |
| 208 | <i>STAT3</i> | chr17:g.40474420           | c.1981G>T          | p.Asp661Tyr      | exact                  | 0.32  | 14/4391  |
| 209 | <i>TET2</i>  | chr4:g.106156704_106156707 | c.1668-1671delCAAA | p.Asn556Lysfs*6  | exact                  | 0.17  | 17/9783  |
| 210 | <i>TET2</i>  | chr4:g.106156707_106156708 | c.1671dupA         | p.Glu558Argfs*30 | new LoF<br><i>TET2</i> | 0.92  | 46/5001  |



|     |             |                  |           |             |                        |      |          |
|-----|-------------|------------------|-----------|-------------|------------------------|------|----------|
| 211 | <i>TET2</i> | chr4:g.106156729 | c.1693C>T | p.Arg565Ter | new LoF<br><i>TET2</i> | 0·06 | 6/9466   |
| 212 | <i>TET2</i> | chr4:g.106156747 | c.1711C>T | p.Arg571Ter | exact                  | 9·79 | 207/2114 |
| 213 | <i>TP53</i> | chr17:g.7578410  | c.520A>G  | p.Arg174Gly | new                    | 0·24 | 7/2877   |
| 214 | <i>TP53</i> | chr17:g.7578410  | c.520A>G  | p.Arg174Gly | new                    | 0·17 | 13/7564  |
| 215 | <i>TP53</i> | chr17:g.7578410  | c.520A>G  | p.Arg174Gly | new                    | 0·15 | 13/8940  |
| 216 | <i>TP53</i> | chr17:g.7578410  | c.520A>G  | p.Arg174Gly | new                    | 0·13 | 9/6776   |

- a) *CHDMs in the literature are listed in Table S4a*
- b) *We cannot exclude that some detected somatic mutations with very low VAF are false positives*
- c) *Average variant and total read counts for PCR1 and PCR2. Generated by mpileups of all non-error-corrected reads; insertions and deletions are manually checked for read counts in the IGV browser*

**Table S3b:** CHDMs identified in the single-timepoint bariatric surgery group

| ID  | Gene name     | Location                 | HGVS c                   | HGVS p           | Literature <sup>a</sup> | VAF <sup>b</sup> | Read count <sup>c</sup><br>variant / total |
|-----|---------------|--------------------------|--------------------------|------------------|-------------------------|------------------|--------------------------------------------|
| 217 | <i>ASXL1</i>  | chr20:g.31021250         | c.1249C>T                | p.Arg417Ter      | exact                   | 5.53             | 137/2476                                   |
| 218 | <i>ASXL1</i>  | chr20:g.31022904         | c.2389G>T                | p.Glu797Ter      | overlapping             | 0.93             | 48/5176                                    |
| 219 | <i>BRCC3</i>  | chrX:g.154305514         | c.265C>T                 | p.Arg89Ter       | exact                   | 3.07             | 56/1825                                    |
| 219 | <i>GNAS</i>   | chr20:g.57484417         | c.2527T>C                | p.Cys843Arg      | new                     | 0.25             | 10/3963                                    |
| 220 | <i>BRCC3</i>  | chrX:g.154305522         | c.273A>T                 | p.Glu91Asp       | new                     | 14.46            | 104/719                                    |
| 221 | <i>CBL</i>    | chr11:g.119149003        | c.1223G>C                | p.Trp408Ser      | overlapping             | 2.88             | 65/2257                                    |
| 222 | <i>CBL</i>    | chr11:g.119149250        | c.1258C>T                | p.Arg420Ter      | overlapping             | 0.22             | 13/5908                                    |
| 223 | <i>CBL</i>    | chr11:g.119149251        | c.1259G>A                | p.Arg420Gln      | exact                   | 1.11             | 25/2252                                    |
| 224 | <i>CBL</i>    | chr11:g.119149251        | c.1259G>A                | p.Arg420Gln      | exact                   | 3.23             | 121/3742                                   |
| 225 | <i>CBL</i>    | chr11:g.119149251        | c.1259G>A                | p.Arg420Gln      | exact                   | 0.13             | 12/9552                                    |
| 226 | <i>DNMT3A</i> | chr2:g.25463289          | c.2204A>G                | p.Tyr735Cys      | exact                   | 0.55             | 18/3252                                    |
| 226 | <i>DNMT3A</i> | chr2:g.25458585          | c.2588A>T                | p.Glu863Val      | exact                   | 0.65             | 48/7347                                    |
| 226 | <i>DNMT3A</i> | chr2:g.25457158          | c.2729C>T                | p.Ala910Val      | exact                   | 8.06             | 275/3413                                   |
| 226 | <i>JAK2</i>   | chr9:g.5073770           | c.1849G>T                | p.Val617Phe      | exact                   | 0.32             | 18/5549                                    |
| 227 | <i>DNMT3A</i> | chr2:g.25463308          | c.2185C>G                | p.Arg729Gly      | exact                   | 0.25             | 17/6829                                    |
| 227 | <i>DNMT3A</i> | chr2:g.25463182_25463183 | c.2301_2310dupGGACATCTCG | p.Arg771Glyfs*14 | overlapping             | 1.51             | 145/9615                                   |
| 227 | <i>DNMT3A</i> | chr2:g.25457176          | c.2711C>T                | p.Pro904Leu      | exact                   | 0.13             | 11/8403                                    |
| 228 | <i>DNMT3A</i> | chr2:g.25457176          | c.2711C>T                | p.Pro904Leu      | exact                   | 0.38             | 23/6067                                    |
| 228 | <i>TET2</i>   | chr4:g.106157725         | c.2689C>T                | p.Gln897Ter      | overlapping             | 1.29             | 35/2706                                    |
| 229 | <i>DNMT3A</i> | chr2:g.25457176          | c.2711C>T                | p.Pro904Leu      | exact                   | 0.22             | 10/4532                                    |
| 230 | <i>DNMT3A</i> | chr2:g.25457176          | c.2711C>T                | p.Pro904Leu      | exact                   | 0.10             | 8/7867                                     |
| 231 | <i>DNMT3A</i> | chr2:g.25457176          | c.2711C>T                | p.Pro904Leu      | exact                   | 2.40             | 144/6010                                   |
| 232 | <i>DNMT3A</i> | chr2:g.25457176          | c.2711C>A                | p.Pro904Gln      | exact                   | 1.44             | 100/6961                                   |
| 233 | <i>DNMT3A</i> | chr2:g.25457176          | c.2711C>T                | p.Pro904Leu      | exact                   | 1.02             | 22/2156                                    |
| 234 | <i>DNMT3A</i> | chr2:g.25462074          | c.2333T>G                | p.Val778Gly      | overlapping             | 0.71             | 37/5210                                    |
| 234 | <i>DNMT3A</i> | chr2:g.25457186          | c.2701C>G                | p.Leu901Val      | exact                   | 1.86             | 72/3879                                    |
| 234 | <i>TP53</i>   | chr17:g.7578410          | c.520A>G                 | p.Arg174Gly      | new                     | 0.15             | 10/6515                                    |
| 235 | <i>DNMT3A</i> | chr2:g.25457192          | c.2695C>T                | p.Arg899Cys      | exact                   | 4.46             | 108/2419                                   |

|     |               |                 |           |             |             |       |          |
|-----|---------------|-----------------|-----------|-------------|-------------|-------|----------|
| 236 | <i>DNMT3A</i> | chr2:g.25457192 | c.2695C>T | p.Arg899Cys | exact       | 0.60  | 18/3015  |
| 237 | <i>DNMT3A</i> | chr2:g.25457212 | c.2675C>G | p.Ser892Ter | new         | 1.00  | 51/5103  |
| 238 | <i>DNMT3A</i> | chr2:g.25467190 | c.1685G>T | p.Cys562Phe | overlapping | 6.03  | 192/3184 |
| 238 | <i>DNMT3A</i> | chr2:g.25463588 | c.2094G>A | p.Trp698Ter | exact       | 1.02  | 34/3349  |
| 238 | <i>DNMT3A</i> | chr2:g.25457242 | c.2645G>A | p.Arg882His | exact       | 3.34  | 195/5845 |
| 239 | <i>DNMT3A</i> | chr2:g.25457242 | c.2645G>A | p.Arg882His | exact       | 1.01  | 34/3366  |
| 240 | <i>DNMT3A</i> | chr2:g.25457242 | c.2645G>A | p.Arg882His | exact       | 0.84  | 29/3472  |
| 241 | <i>DNMT3A</i> | chr2:g.25457242 | c.2645G>A | p.Arg882His | exact       | 2.43  | 98/4037  |
| 242 | <i>DNMT3A</i> | chr2:g.25457242 | c.2645G>A | p.Arg882His | exact       | 1.63  | 37/2272  |
| 243 | <i>DNMT3A</i> | chr2:g.25457242 | c.2645G>A | p.Arg882His | exact       | 12.91 | 550/4259 |
| 244 | <i>DNMT3A</i> | chr2:g.25457242 | c.2645G>A | p.Arg882His | exact       | 1.88  | 63/3351  |
| 245 | <i>DNMT3A</i> | chr2:g.25457242 | c.2645G>A | p.Arg882His | exact       | 1.16  | 70/6043  |
| 246 | <i>DNMT3A</i> | chr2:g.25457242 | c.2645G>A | p.Arg882His | exact       | 0.21  | 10/4797  |
| 247 | <i>DNMT3A</i> | chr2:g.25468910 | c.1453C>T | p.Gln485Ter | exact       | 0.61  | 30/4911  |
| 247 | <i>DNMT3A</i> | chr2:g.25464533 | c.1980C>A | p.Tyr660Ter | overlapping | 2.35  | 89/3784  |
| 247 | <i>DNMT3A</i> | chr2:g.25457243 | c.2644C>A | p.Arg882Ser | exact       | 0.88  | 39/4455  |
| 248 | <i>DNMT3A</i> | chr2:g.25457243 | c.2644C>T | p.Arg882Cys | exact       | 0.48  | 14/2928  |
| 248 | <i>DNMT3A</i> | chr2:g.25470480 | c.994G>A  | p.Gly332Arg | exact       | 0.63  | 17/2685  |
| 249 | <i>DNMT3A</i> | chr2:g.25464544 | c.1969G>A | p.Val657Met | exact       | 0.50  | 15/2982  |
| 249 | <i>DNMT3A</i> | chr2:g.25457243 | c.2644C>T | p.Arg882Cys | exact       | 0.82  | 29/3531  |
| 250 | <i>DNMT3A</i> | chr2:g.25463182 | c.2311C>T | p.Arg771Ter | exact       | 4.82  | 325/6747 |
| 250 | <i>DNMT3A</i> | chr2:g.25457243 | c.2644C>T | p.Arg882Cys | exact       | 1.45  | 48/3321  |
| 251 | <i>DNMT3A</i> | chr2:g.25457243 | c.2644C>A | p.Arg882Ser | exact       | 3.35  | 124/3698 |
| 252 | <i>DNMT3A</i> | chr2:g.25457243 | c.2644C>T | p.Arg882Cys | exact       | 0.69  | 15/2172  |
| 253 | <i>DNMT3A</i> | chr2:g.25457243 | c.2644C>T | p.Arg882Cys | exact       | 2.07  | 76/3664  |
| 254 | <i>DNMT3A</i> | chr2:g.25457243 | c.2644C>T | p.Arg882Cys | exact       | 0.46  | 26/5714  |
| 255 | <i>DNMT3A</i> | chr2:g.25457243 | c.2644C>T | p.Arg882Cys | exact       | 2.91  | 48/1651  |
| 256 | <i>DNMT3A</i> | chr2:g.25457243 | c.2644C>T | p.Arg882Cys | exact       | 0.33  | 13/3899  |
| 257 | <i>DNMT3A</i> | chr2:g.25457249 | c.2638A>G | p.Met880Val | exact       | 0.44  | 23/5278  |
| 258 | <i>DNMT3A</i> | chr2:g.25457249 | c.2638A>G | p.Met880Val | exact       | 0.33  | 11/3381  |
| 259 | <i>DNMT3A</i> | chr2:g.25457269 | c.2618A>G | p.His873Arg | exact       | 6.20  | 335/5401 |

|     |               |                          |            |                  |             |       |          |
|-----|---------------|--------------------------|------------|------------------|-------------|-------|----------|
| 260 | <i>DNMT3A</i> | chr2:g.25457269          | c.2618A>G  | p.His873Arg      | exact       | 0.28  | 10/3632  |
| 261 | <i>DNMT3A</i> | chr2:g.25457288          | c.2599delG | p.Val867Tyrfs*14 | exact       | 22.39 | 543/2425 |
| 262 | <i>DNMT3A</i> | chr2:g.25458595          | c.2578T>C  | p.Trp860Arg      | exact       | 1.12  | 89/7935  |
| 263 | <i>DNMT3A</i> | chr2:g.25458595          | c.2578T>C  | p.Trp860Arg      | exact       | 1.96  | 127/6466 |
| 264 | <i>DNMT3A</i> | chr2:g.25458595_25458596 | c.2577dupA | p.Trp860Metfs*4  | exact       | 0.37  | 22/5887  |
| 265 | <i>DNMT3A</i> | chr2:g.25463286          | c.2207G>A  | p.Arg736His      | exact       | 6.79  | 111/1634 |
| 265 | <i>DNMT3A</i> | chr2:g.25459837          | c.2446C>T  | p.Gln816Ter      | exact       | 2.93  | 49/1675  |
| 265 | <i>DNMT3A</i> | chr2:g.25458652          | c.2521A>T  | p.Lys841Ter      | exact       | 1.18  | 45/3823  |
| 266 | <i>DNMT3A</i> | chr2:g.25458659_25458660 | c.2513dupA | p.Asn838Lysfs*17 | exact       | 7.63  | 506/6636 |
| 267 | <i>DNMT3A</i> | chr2:g.25461999          | c.2408G>C  | p.Arg803Thr      | overlapping | 10.44 | 188/1801 |
| 268 | <i>DNMT3A</i> | chr2:g.25462000          | c.2407A>T  | p.Arg803Trp      | exact       | 9.48  | 280/2955 |
| 269 | <i>DNMT3A</i> | chr2:g.25462020          | c.2387G>A  | p.Gly796Asp      | exact       | 6.18  | 84/1360  |
| 270 | <i>DNMT3A</i> | chr2:g.25466800          | c.1903C>T  | p.Arg635Trp      | exact       | 1.30  | 54/4156  |
| 270 | <i>DNMT3A</i> | chr2:g.25462068          | c.2339T>C  | p.Ile780Thr      | exact       | 1.94  | 76/3916  |
| 271 | <i>DNMT3A</i> | chr2:g.25462068          | c.2339T>C  | p.Ile780Thr      | exact       | 0.25  | 10/4029  |
| 272 | <i>DNMT3A</i> | chr2:g.25462068          | c.2339T>C  | p.Ile780Thr      | exact       | 0.79  | 29/3685  |
| 273 | <i>DNMT3A</i> | chr2:g.25462068          | c.2339T>C  | p.Ile780Thr      | exact       | 5.47  | 249/4550 |
| 274 | <i>DNMT3A</i> | chr2:g.25462068          | c.2339T>C  | p.Ile780Thr      | exact       | 0.32  | 15/4682  |
| 275 | <i>DNMT3A</i> | chr2:g.25462074          | c.2333T>A  | p.Val778Glu      | overlapping | 2.91  | 98/3362  |
| 276 | <i>DNMT3A</i> | chr2:g.25463172          | c.2321A>G  | p.Glu774Gly      | exact       | 0.99  | 42/4237  |
| 277 | <i>DNMT3A</i> | chr2:g.25463180          | c.2313delA | p.Leu773Serfs*6  | overlapping | 0.42  | 37/8897  |
| 278 | <i>DNMT3A</i> | chr2:g.25463181          | c.2312G>C  | p.Arg771Pro      | exact       | 0.41  | 32/7718  |
| 279 | <i>DNMT3A</i> | chr2:g.25463181          | c.2312G>A  | p.Arg771Gln      | exact       | 0.24  | 20/8328  |
| 280 | <i>DNMT3A</i> | chr2:g.25463269          | c.2224C>G  | p.Arg742Gly      | overlapping | 3.60  | 147/4089 |
| 280 | <i>DNMT3A</i> | chr2:g.25463182          | c.2311C>T  | p.Arg771Ter      | exact       | 0.15  | 12/8058  |
| 281 | <i>DNMT3A</i> | chr2:g.25463182          | c.2311C>T  | p.Arg771Ter      | exact       | 0.27  | 15/5563  |
| 282 | <i>DNMT3A</i> | chr2:g.25463182          | c.2311C>T  | p.Arg771Ter      | exact       | 0.20  | 18/8990  |
| 283 | <i>DNMT3A</i> | chr2:g.25463289          | c.2204A>G  | p.Tyr735Cys      | exact       | 0.68  | 19/2807  |
| 283 | <i>DNMT3A</i> | chr2:g.25463184          | c.2309C>G  | p.Ser770Trp      | exact       | 0.32  | 27/8491  |
| 284 | <i>DNMT3A</i> | chr2:g.25463184          | c.2309C>A  | p.Ser770Ter      | exact       | 2.00  | 196/9800 |

|     |               |                 |            |                  |             |       |          |
|-----|---------------|-----------------|------------|------------------|-------------|-------|----------|
| 285 | <i>DNMT3A</i> | chr2:g.25463184 | c.2309C>T  | p.Ser770Leu      | exact       | 0.24  | 23/9666  |
| 286 | <i>DNMT3A</i> | chr2:g.25463184 | c.2309C>T  | p.Ser770Leu      | exact       | 0.23  | 16/6902  |
| 287 | <i>DNMT3A</i> | chr2:g.25463184 | c.2309C>T  | p.Ser770Leu      | exact       | 0.64  | 61/9513  |
| 288 | <i>DNMT3A</i> | chr2:g.25463184 | c.2309C>T  | p.Ser770Leu      | exact       | 0.32  | 28/8797  |
| 289 | <i>DNMT3A</i> | chr2:g.25463186 | c.2307C>G  | p.Ile769Met      | overlapping | 0.16  | 15/9550  |
| 290 | <i>DNMT3A</i> | chr2:g.25463289 | c.2204A>G  | p.Tyr735Cys      | exact       | 0.42  | 16/3830  |
| 290 | <i>DNMT3A</i> | chr2:g.25463190 | c.2303A>G  | p.Asp768Gly      | overlapping | 0.11  | 11/9590  |
| 291 | <i>DNMT3A</i> | chr2:g.25466800 | c.1903C>G  | p.Arg635Gly      | exact       | 1.19  | 57/4781  |
| 291 | <i>DNMT3A</i> | chr2:g.25463190 | c.2303A>G  | p.Asp768Gly      | overlapping | 0.02  | 2/9830   |
| 292 | <i>DNMT3A</i> | chr2:g.25463190 | c.2303A>G  | p.Asp768Gly      | overlapping | 0.04  | 4/9826   |
| 293 | <i>DNMT3A</i> | chr2:g.25463190 | c.2303A>G  | p.Asp768Gly      | overlapping | 0.01  | 1/9832   |
| 294 | <i>DNMT3A</i> | chr2:g.25463190 | c.2303A>G  | p.Asp768Gly      | overlapping | 0.04  | 4/9798   |
| 295 | <i>DNMT3A</i> | chr2:g.25463194 | c.2299delA | p.Arg767Glyfs*12 | new         | 4.07  | 160/3933 |
| 296 | <i>DNMT3A</i> | chr2:g.25463229 | c.2264T>C  | p.Phe755Ser      | exact       | 3.41  | 140/4101 |
| 297 | <i>DNMT3A</i> | chr2:g.25463229 | c.2264T>C  | p.Phe755Ser      | exact       | 0.41  | 17/4136  |
| 298 | <i>DNMT3A</i> | chr2:g.25463230 | c.2263T>A  | p.Phe755Ile      | exact       | 0.84  | 50/5957  |
| 299 | <i>DNMT3A</i> | chr2:g.25463260 | c.2233G>T  | p.Glu745Ter      | exact       | 1.79  | 85/4739  |
| 300 | <i>DNMT3A</i> | chr2:g.25463272 | c.2221G>C  | p.Ala741Pro      | overlapping | 1.40  | 45/3217  |
| 300 | <i>GNBI</i>   | chr1:g.1747229  | c.169A>G   | p.Lys57Glu       | exact       | 0.76  | 33/4365  |
| 301 | <i>DNMT3A</i> | chr2:g.25463283 | c.2210T>G  | p.Leu737Arg      | exact       | 1.15  | 50/4341  |
| 302 | <i>DNMT3A</i> | chr2:g.25463286 | c.2207G>A  | p.Arg736His      | exact       | 0.61  | 24/3918  |
| 303 | <i>DNMT3A</i> | chr2:g.25463287 | c.2206C>G  | p.Arg736Gly      | exact       | 0.52  | 19/3650  |
| 304 | <i>DNMT3A</i> | chr2:g.25463287 | c.2206C>T  | p.Arg736Cys      | exact       | 0.41  | 10/2449  |
| 305 | <i>DNMT3A</i> | chr2:g.25463583 | c.2099C>T  | p.Pro700Leu      | exact       | 0.38  | 19/5035  |
| 305 | <i>DNMT3A</i> | chr2:g.25463289 | c.2204A>G  | p.Tyr735Cys      | exact       | 7.51  | 315/4193 |
| 306 | <i>DNMT3A</i> | chr2:g.25463289 | c.2204A>G  | p.Tyr735Cys      | exact       | 17.70 | 686/3875 |
| 306 | <i>DNMT3A</i> | chr2:g.25470923 | c.838delG  | p.Asp280Thrfs*36 | new         | 1.36  | 35/2571  |
| 307 | <i>DNMT3A</i> | chr2:g.25463289 | c.2204A>G  | p.Tyr735Cys      | exact       | 0.68  | 21/3094  |
| 308 | <i>DNMT3A</i> | chr2:g.25463289 | c.2204A>G  | p.Tyr735Cys      | exact       | 0.41  | 22/5398  |
| 309 | <i>DNMT3A</i> | chr2:g.25463289 | c.2204A>G  | p.Tyr735Cys      | exact       | 0.50  | 11/2196  |
| 310 | <i>DNMT3A</i> | chr2:g.25463289 | c.2204A>G  | p.Tyr735Cys      | exact       | 1.11  | 36/3244  |

|     |               |                          |                   |                   |             |       |          |
|-----|---------------|--------------------------|-------------------|-------------------|-------------|-------|----------|
| 311 | <i>DNMT3A</i> | chr2:g.25463289          | c.2204A>G         | p.Tyr735Cys       | exact       | 0.24  | 9/3745   |
| 312 | <i>DNMT3A</i> | chr2:g.25463289          | c.2204A>C         | p.Tyr735Ser       | exact       | 2.83  | 110/3891 |
| 313 | <i>DNMT3A</i> | chr2:g.25463289          | c.2204A>G         | p.Tyr735Cys       | exact       | 0.32  | 13/4011  |
| 314 | <i>DNMT3A</i> | chr2:g.25463289          | c.2204A>G         | p.Tyr735Cys       | exact       | 0.78  | 27/3478  |
| 315 | <i>DNMT3A</i> | chr2:g.25463289          | c.2204A>G         | p.Tyr735Cys       | exact       | 0.19  | 8/4131   |
| 316 | <i>DNMT3A</i> | chr2:g.25463289          | c.2204A>G         | p.Tyr735Cys       | exact       | 0.21  | 8/3796   |
| 317 | <i>DNMT3A</i> | chr2:g.25463289          | c.2204A>G         | p.Tyr735Cys       | exact       | 3.20  | 84/2626  |
| 318 | <i>DNMT3A</i> | chr2:g.25463296_25463297 | c.2196_2197insAG  | p.Glu733Argfs*47  | exact       | 1.93  | 74/3825  |
| 319 | <i>DNMT3A</i> | chr2:g.25463298          | c.2195T>C         | p.Phe732Ser       | exact       | 2.52  | 110/4363 |
| 320 | <i>DNMT3A</i> | chr2:g.25463298_25463300 | c.2193_2195delCTT | p.Phe732del       | exact       | 15.22 | 647/4250 |
| 320 | <i>GNBI</i>   | chr1:g.1747227           | c.171G>T          | p.Lys57Asn        | exact       | 15.31 | 519/3391 |
| 321 | <i>DNMT3A</i> | chr2:g.25463298_25463300 | c.2193_2195delCTT | p.Phe732del       | exact       | 1.89  | 46/2429  |
| 322 | <i>DNMT3A</i> | chr2:g.25463298_25463300 | c.2193_2195delCTT | p.Phe732del       | exact       | 0.51  | 19/3727  |
| 323 | <i>DNMT3A</i> | chr2:g.25463300          | c.2193C>G         | p.Phe731Leu       | exact       | 0.63  | 45/7172  |
| 324 | <i>DNMT3A</i> | chr2:g.25463307          | c.2186G>A         | p.Arg729Gln       | exact       | 0.20  | 15/7667  |
| 325 | <i>DNMT3A</i> | chr2:g.25469490          | c.1278delA        | p.Glu427Lysfs*224 | exact       | 6.05  | 86/1421  |
| 325 | <i>DNMT3A</i> | chr2:g.25463308          | c.2185C>T         | p.Arg729Trp       | exact       | 0.51  | 24/4742  |
| 326 | <i>DNMT3A</i> | chr2:g.25463308          | c.2185C>T         | p.Arg729Trp       | exact       | 0.62  | 51/8260  |
| 327 | <i>DNMT3A</i> | chr2:g.25463308          | c.2185C>T         | p.Arg729Trp       | exact       | 0.69  | 35/5047  |
| 328 | <i>DNMT3A</i> | chr2:g.25463308          | c.2185C>T         | p.Arg729Trp       | exact       | 0.51  | 19/3712  |
| 329 | <i>DNMT3A</i> | chr2:g.25463308          | c.2185C>T         | p.Arg729Trp       | exact       | 1.12  | 94/8390  |
| 330 | <i>DNMT3A</i> | chr2:g.25463316          | c.2177delG        | p.Gly726Alafs*53  | exact       | 0.94  | 44/4673  |
| 331 | <i>DNMT3A</i> | chr2:g.25463539_25463540 | c.2142dupC        | p.Ile715Hisfs*19  | exact       | 6.69  | 114/1703 |
| 332 | <i>DNMT3A</i> | chr2:g.25463541          | c.2141C>T         | p.Ser714Phe       | overlapping | 14.84 | 236/1590 |
| 333 | <i>DNMT3A</i> | chr2:g.25463577          | c.2105A>G         | p.Asp702Gly       | overlapping | 0.65  | 21/3229  |
| 334 | <i>DNMT3A</i> | chr2:g.25463583          | c.2099C>T         | p.Pro700Leu       | exact       | 9.54  | 244/2557 |
| 335 | <i>DNMT3A</i> | chr2:g.25463584          | c.2098C>A         | p.Pro700Thr       | exact       | 0.64  | 14/2176  |
| 336 | <i>DNMT3A</i> | chr2:g.25463586          | c.2096G>A         | p.Gly699Asp       | exact       | 0.93  | 32/3444  |

|     |               |                          |            |                   |             |       |          |
|-----|---------------|--------------------------|------------|-------------------|-------------|-------|----------|
| 337 | <i>DNMT3A</i> | chr2:g.25463586          | c.2096G>A  | p.Gly699Asp       | exact       | 2.44  | 40/1642  |
| 338 | <i>DNMT3A</i> | chr2:g.25468150          | c.1526delT | p.Phe509Serfs*142 | exact       | 2.11  | 35/1660  |
| 338 | <i>DNMT3A</i> | chr2:g.25463596          | c.2086delC | p.Gln696Argfs*9   | exact       | 2.82  | 85/3014  |
| 339 | <i>DNMT3A</i> | chr2:g.25463596          | c.2086C>T  | p.Gln696Ter       | exact       | 1.69  | 53/3139  |
| 340 | <i>DNMT3A</i> | chr2:g.25464534          | c.1979A>G  | p.Tyr660Cys       | exact       | 0.58  | 48/8338  |
| 341 | <i>DNMT3A</i> | chr2:g.25464537          | c.1976G>A  | p.Arg659His       | exact       | 0.13  | 9/6921   |
| 342 | <i>DNMT3A</i> | chr2:g.25464541          | c.1972G>T  | p.Asp658Tyr       | overlapping | 1.59  | 46/2886  |
| 343 | <i>DNMT3A</i> | chr2:g.25464544          | c.1969G>A  | p.Val657Met       | exact       | 8.95  | 429/4795 |
| 344 | <i>DNMT3A</i> | chr2:g.25464544          | c.1969G>A  | p.Val657Met       | exact       | 0.73  | 16/2198  |
| 345 | <i>DNMT3A</i> | chr2:g.25464570          | c.1943T>C  | p.Leu648Pro       | new         | 0.20  | 11/5560  |
| 346 | <i>DNMT3A</i> | chr2:g.25464570          | c.1943T>C  | p.Leu648Pro       | new         | 5.56  | 169/3042 |
| 347 | <i>DNMT3A</i> | chr2:g.25464570          | c.1943T>C  | p.Leu648Pro       | new         | 0.20  | 10/5102  |
| 348 | <i>DNMT3A</i> | chr2:g.25464576          | c.1937G>A  | p.Gly646Glu       | exact       | 1.09  | 44/4044  |
| 349 | <i>DNMT3A</i> | chr2:g.25466767          | c.1936G>A  | p.Gly646Arg       | exact       | 0.71  | 14/1983  |
| 350 | <i>DNMT3A</i> | chr2:g.25466797          | c.1906G>A  | p.Val636Met       | exact       | 0.71  | 15/2114  |
| 351 | <i>DNMT3A</i> | chr2:g.25466797          | c.1906G>A  | p.Val636Met       | exact       | 20.93 | 736/3517 |
| 352 | <i>DNMT3A</i> | chr2:g.25466799          | c.1904G>T  | p.Arg635Leu       | exact       | 4.87  | 164/3370 |
| 353 | <i>DNMT3A</i> | chr2:g.25466799          | c.1904G>A  | p.Arg635Gln       | exact       | 5.17  | 132/2555 |
| 354 | <i>DNMT3A</i> | chr2:g.25466800          | c.1903C>T  | p.Arg635Trp       | exact       | 0.48  | 15/3155  |
| 355 | <i>DNMT3A</i> | chr2:g.25467038          | c.1837delC | p.His613Thrfs*38  | exact       | 6.17  | 84/1362  |
| 356 | <i>DNMT3A</i> | chr2:g.25467073          | c.1802G>A  | p.Trp601Ter       | exact       | 5.57  | 92/1652  |
| 357 | <i>DNMT3A</i> | chr2:g.25467083          | c.1792C>T  | p.Arg598Ter       | exact       | 1.11  | 17/1536  |
| 358 | <i>DNMT3A</i> | chr2:g.25467083          | c.1792C>T  | p.Arg598Ter       | exact       | 6.51  | 134/2059 |
| 359 | <i>DNMT3A</i> | chr2:g.25467087          | c.1788delG | p.Arg597Glyfs*54  | overlapping | 2.74  | 82/2990  |
| 360 | <i>DNMT3A</i> | chr2:g.25467091          | c.1784T>C  | p.Leu595Pro       | exact       | 0.52  | 20/3867  |
| 360 | <i>JAK2</i>   | chr9:g.5073770           | c.1849G>T  | p.Val617Phe       | exact       | 0.46  | 38/8186  |
| 361 | <i>DNMT3A</i> | chr2:g.25467200          | c.1675delT | p.Cys559Alafs*92  | exact       | 10.21 | 69/676   |
| 362 | <i>DNMT3A</i> | chr2:g.25467447_25467448 | c.1628dupG | p.Arg544Profs*2   | new         | 2.88  | 65/2259  |
| 363 | <i>DNMT3A</i> | chr2:g.25467448          | c.1628G>C  | p.Gly543Ala       | exact       | 4.79  | 64/1336  |
| 364 | <i>DNMT3A</i> | chr2:g.25467449          | c.1627G>T  | p.Gly543Cys       | exact       | 2.64  | 60/2276  |
| 365 | <i>DNMT3A</i> | chr2:g.25468125          | c.1551C>G  | p.Cys517Trp       | exact       | 1.49  | 51/3425  |

|     |               |                          |                |                  |             |       |          |
|-----|---------------|--------------------------|----------------|------------------|-------------|-------|----------|
| 366 | <i>DNMT3A</i> | chr2:g.25470480          | c.994G>A       | p.Gly332Arg      | exact       | 0.31  | 15/4812  |
| 367 | <i>DNMT3A</i> | chr2:g.25470484          | c.990G>T       | p.Trp330Cys      | overlapping | 0.68  | 38/5626  |
| 368 | <i>DNMT3A</i> | chr2:g.25470485          | c.989G>A       | p.Trp330Ter      | exact       | 0.74  | 28/3774  |
| 369 | <i>DNMT3A</i> | chr2:g.25470516          | c.958C>T       | p.Arg320Ter      | exact       | 0.29  | 13/4498  |
| 370 | <i>DNMT3A</i> | chr2:g.25470516          | c.958C>T       | p.Arg320Ter      | exact       | 0.68  | 42/6168  |
| 371 | <i>DNMT3A</i> | chr2:g.25470516          | c.958C>T       | p.Arg320Ter      | exact       | 3.54  | 107/3026 |
| 372 | <i>DNMT3A</i> | chr2:g.25470533          | c.941G>A       | p.Trp314Ter      | exact       | 12.72 | 43/338   |
| 373 | <i>DNMT3A</i> | chr2:g.25470992_25470993 | c.767_768dupCC | p.Thr257Profs*60 | exact       | 4.14  | 87/2102  |
| 374 | <i>GNAS</i>   | chr20:g.57484414         | c.2524C>T      | p.Arg842Cys      | new         | 0.09  | 9/9681   |
| 375 | <i>GNAS</i>   | chr20:g.57484414         | c.2524C>T      | p.Arg842Cys      | new         | 0.13  | 10/7882  |
| 376 | <i>GNAS</i>   | chr20:g.57484417         | c.2527T>C      | p.Cys843Arg      | new         | 0.14  | 12/8533  |
| 377 | <i>GNAS</i>   | chr20:g.57484420         | c.2530C>T      | p.Arg844Cys      | exact       | 0.08  | 8/9681   |
| 377 | <i>IDH2</i>   | chr15:g.90631935         | c.418C>T       | p.Arg140Trp      | exact       | 0.11  | 10/9285  |
| 378 | <i>GNAS</i>   | chr20:g.57484420         | c.2530C>T      | p.Arg844Cys      | exact       | 1.19  | 114/9600 |
| 379 | <i>GNAS</i>   | chr20:g.57484421         | c.2531G>A      | p.Arg844His      | exact       | 0.36  | 12/3375  |
| 380 | <i>GNAS</i>   | chr20:g.57484421         | c.2531G>A      | p.Arg844His      | exact       | 0.21  | 19/9233  |
| 381 | <i>GNAS</i>   | chr20:g.57484421         | c.2531G>A      | p.Arg844His      | exact       | 0.74  | 45/6070  |
| 382 | <i>GNAS</i>   | chr20:g.57484421         | c.2531G>A      | p.Arg844His      | exact       | 0.42  | 32/7677  |
| 383 | <i>GNB1</i>   | chr1:g.1747229           | c.169A>G       | p.Lys57Glu       | exact       | 1.25  | 84/6745  |
| 384 | <i>GNB1</i>   | chr1:g.1747229           | c.169A>G       | p.Lys57Glu       | exact       | 1.17  | 48/4104  |
| 385 | <i>GNB1</i>   | chr1:g.1747229           | c.169A>G       | p.Lys57Glu       | exact       | 0.19  | 17/8969  |
| 386 | <i>GNB1</i>   | chr1:g.1747229           | c.169A>G       | p.Lys57Glu       | exact       | 0.24  | 17/7149  |
| 387 | <i>GNB1</i>   | chr1:g.1747229           | c.169A>G       | p.Lys57Glu       | exact       | 0.30  | 16/5246  |
| 388 | <i>IDH2</i>   | chr15:g.90631934         | c.419G>A       | p.Arg140Gln      | exact       | 9.52  | 268/2816 |
| 389 | <i>IDH2</i>   | chr15:g.90631934         | c.419G>A       | p.Arg140Gln      | exact       | 1.07  | 46/4309  |
| 390 | <i>IDH2</i>   | chr15:g.90631935         | c.418C>T       | p.Arg140Trp      | exact       | 0.09  | 8/9295   |
| 391 | <i>JAK2</i>   | chr9:g.5073770           | c.1849G>T      | p.Val617Phe      | exact       | 7.06  | 189/2677 |
| 392 | <i>JAK2</i>   | chr9:g.5073770           | c.1849G>T      | p.Val617Phe      | exact       | 5.39  | 258/4789 |
| 393 | <i>KRAS</i>   | chr12:g.25398281         | c.38G>A        | p.Gly13Asp       | exact       | 0.89  | 43/4818  |
| 394 | <i>KRAS</i>   | chr12:g.25398285         | c.34G>T        | p.Gly12Cys       | exact       | 1.21  | 63/5190  |
| 395 | <i>SF3B1</i>  | chr2:g.198266834         | c.2098A>G      | p.Lys700Glu      | exact       | 0.31  | 28/8938  |



|     |              |                  |           |             |                     |       |          |
|-----|--------------|------------------|-----------|-------------|---------------------|-------|----------|
| 396 | <i>SF3B1</i> | chr2:g.198267360 | c.1997A>G | p.Lys666Arg | exact               | 6·80  | 82/1205  |
| 397 | <i>SRSF2</i> | chr17:g.74732960 | c.283C>G  | p.Pro95Ala  | exact               | 11·57 | 172/1487 |
| 398 | <i>STAT3</i> | chr17:g.40474420 | c.1981G>T | p.Asp661Tyr | exact               | 0·57  | 15/2651  |
| 399 | <i>STAT3</i> | chr17:g.40474420 | c.1981G>T | p.Asp661Tyr | exact               | 1·80  | 41/2280  |
| 400 | <i>TET2</i>  | chr4:g.106156729 | c.1693C>T | p.Arg565Ter | new LoF <i>TET2</i> | 0·41  | 27/6511  |
| 401 | <i>TET2</i>  | chr4:g.106156729 | c.1693C>T | p.Arg565Ter | new LoF <i>TET2</i> | 0·02  | 2/9592   |
| 402 | <i>TET2</i>  | chr4:g.106156747 | c.1711C>T | p.Arg571Ter | exact               | 0·76  | 41/5378  |
| 403 | <i>TET2</i>  | chr4:g.106157725 | c.2689C>T | p.Gln897Ter | overlapping         | 0·65  | 24/3671  |
| 404 | <i>TP53</i>  | chr17:g.7578410  | c.520A>G  | p.Arg174Gly | new                 | 0·13  | 11/8349  |
| 405 | <i>TP53</i>  | chr17:g.7578410  | c.520A>G  | p.Arg174Gly | new                 | 0·22  | 13/5785  |

a) *CHDMs in the literature are listed in Table S4a*

b) *We cannot exclude that some detected somatic mutations with very low VAF are false positives*

c) *Average variant and total read counts for PCR1 and PCR2. Generated by mpileups of all non-error-corrected reads; insertions and deletions are manually checked for read counts in the IGV browser*

**Table S4a:** CHDMs in literature – studies used for comparison in Tables S4b-d

| <b>Study (first author, publication year)</b> | <b>PMID</b> |
|-----------------------------------------------|-------------|
| Bick, 2020                                    | 33057201    |
| Busque, 2020                                  | 32492156    |
| Desai, 2020                                   | 29988143    |
| Genovese, 2014                                | 25426838    |
| Jaiswal, 2014                                 | 25426837    |
| Jaiswal, 2017                                 | 28636844    |
| McKerrel, 2015                                | 25732814    |
| Xie, 2014                                     | 25326804    |
| Young, 2016                                   | 27546487    |
| Zink, 2017                                    | 28483762    |

**Table S4b:** Overlap of CHDMs in the single-timepoint usual care group and CHDMs in literature as listed in Table S4a

|                                                       | <b>total CHDM n<br/>(different CHDM n)</b> | <b>total CHDM %<br/>(different CHDM %)</b> | <b>VAF<br/>mean</b> |
|-------------------------------------------------------|--------------------------------------------|--------------------------------------------|---------------------|
| Known mutations in literature                         | 218 (106)                                  | 79.85% (78.52%)                            | 3.08                |
| ..of which reported $\geq 5$ times                    | 169 (64)                                   | 61.90% (47.41%)                            | 2.75                |
| New LoF in <i>DNMT3A</i> , <i>TET2</i> , <i>ASXL1</i> | 8 (7)                                      | 2.93% (5.19%)                              | 3.08                |
| Known AA residue, new mutation                        | 28 (17)                                    | 10.26% (12.59%)                            | 1.32                |
| New AA residue and mutation                           | 19 (5)                                     | 6.96% (3.70%)                              | 0.53                |
| Sum                                                   | 273 (135)                                  |                                            |                     |

**Table S4c:** Overlap of CHDMs in the single-timepoint bariatric surgery group and CHDMs in literature as listed in Table S4a

|                                                       | <b>total CHDM n<br/>(different CHDM n)</b> | <b>total CHDM %<br/>(different CHDM %)</b> | <b>VAF<br/>mean</b> |
|-------------------------------------------------------|--------------------------------------------|--------------------------------------------|---------------------|
| Known mutations in literature                         | 178 (94)                                   | 80.90% (75.81%)                            | 2.52                |
| ..of which reported $\geq 5$ times                    | 139 (51)                                   | 63.18% (41.13%)                            | 2.27                |
| New LoF in <i>DNMT3A</i> , <i>TET2</i> , <i>ASXL1</i> | 2 (1)                                      | 0.91% (0.81%)                              | 0.22                |
| Known AA residue, new mutation                        | 25 (20)                                    | 11.36% (16.13%)                            | 2.25                |
| New AA residue and mutation                           | 15 (9)                                     | 6.82% (7.26%)                              | 2.06                |
| Sum                                                   | 220 (124)                                  |                                            |                     |

**Table S4d:** Overlap of CHDMs in the multiple-timepoint usual care group and CHDMs in the literature as listed in Table S4a

|                                                       | <b>total CHDM n<br/>(different CHDM n)</b> | <b>total CHDM %<br/>(different CHDM %)</b> | <b>Events n</b> | <b>Growing<br/>trajectories n</b> | <b>Shrinking<br/>trajectories n</b> | <b>Static<br/>trajectories n</b> |
|-------------------------------------------------------|--------------------------------------------|--------------------------------------------|-----------------|-----------------------------------|-------------------------------------|----------------------------------|
| Known mutations in literature                         | 62 (34)                                    | 53.91% (64.15%)                            | 7               | 25                                | 5                                   | 25                               |
| ..of which reported $\geq 5$ times                    | 49 (25)                                    | 42.61% (47.17%)                            | 5               | 21                                | 3                                   | 20                               |
| New LoF in <i>DNMT3A</i> , <i>TET2</i> , <i>ASXL1</i> | 9 (5)                                      | 7.83% (9.43%)                              | 5               | 2                                 | 0                                   | 2                                |
| Known AA residue, new mutation                        | 19 (7)                                     | 16.52% (13.21%)                            | 14              | 3                                 | 0                                   | 2                                |
| New AA residue and mutation                           | 25 (7)                                     | 21.74% (13.21%)                            | 12              | 0                                 | 0                                   | 13                               |
| Sum                                                   | 115 (53)                                   |                                            | 38              | 30                                | 5                                   | 42                               |

**Table S5:** CHDMs identified in the multiple-timepoint usual care group

| ID  | Gene name     | Location                  | HGVS c           | HGVS p          | Literature <sup>a</sup>  | VAF <sup>b</sup> | Type of CHDM       | Timepoint | Read count <sup>c</sup> variant / total |
|-----|---------------|---------------------------|------------------|-----------------|--------------------------|------------------|--------------------|-----------|-----------------------------------------|
| 406 | <i>ASXL1</i>  | chr20:g.31022599_31022600 | c.2083_2084dupCA | p.Gln695Hisfs*9 | exact                    | 0·63             | static trajectory  | A         | 61/9668                                 |
| 406 | <i>ASXL1</i>  | chr20:g.31022599_31022600 | c.2083_2084dupCA | p.Gln695Hisfs*9 | exact                    | 0·78             | static trajectory  | B         | 28/3585                                 |
| 406 | <i>ASXL1</i>  | chr20:g.31022599_31022600 | c.2083_2084dupCA | p.Gln695Hisfs*9 | exact                    | 0·15             | static trajectory  | D         | 12/7745                                 |
| 406 | <i>ASXL1</i>  | chr20:g.31022599_31022600 | c.2083_2084dupCA | p.Gln695Hisfs*9 | exact                    | 0·38             | static trajectory  | E         | 6/1591                                  |
| 406 | <i>DNMT3A</i> | chr2:g.25457243           | c.2644C>T        | p.Arg882Cys     | exact                    | 7·53             | growing trajectory | A         | 733/9739                                |
| 406 | <i>DNMT3A</i> | chr2:g.25457243           | c.2644C>T        | p.Arg882Cys     | exact                    | 7·25             | growing trajectory | B         | 202/2788                                |
| 406 | <i>DNMT3A</i> | chr2:g.25457243           | c.2644C>T        | p.Arg882Cys     | exact                    | 6·03             | growing trajectory | C         | 317/5261                                |
| 406 | <i>DNMT3A</i> | chr2:g.25457243           | c.2644C>T        | p.Arg882Cys     | exact                    | 6·66             | growing trajectory | D         | 639/9598                                |
| 406 | <i>DNMT3A</i> | chr2:g.25457243           | c.2644C>T        | p.Arg882Cys     | exact                    | 8·09             | growing trajectory | E         | 531/6561                                |
| 406 | <i>DNMT3A</i> | chr2:g.25459831           | c.2452T>C        | p.Cys818Arg     | overlapping              | 0·44             | static trajectory  | C         | 11/2482                                 |
| 406 | <i>DNMT3A</i> | chr2:g.25459831           | c.2452T>C        | p.Cys818Arg     | overlapping              | 0·18             | static trajectory  | D         | 17/9441                                 |
| 406 | <i>DNMT3A</i> | chr2:g.25459831           | c.2452T>C        | p.Cys818Arg     | overlapping              | 0·46             | static trajectory  | E         | 14/3019                                 |
| 406 | <i>DNMT3A</i> | chr2:g.25469996           | c.1046C>A        | p.Ser349Ter     | new LoF<br><i>DNMT3A</i> | 0·74             | growing trajectory | A         | 35/4758                                 |
| 406 | <i>DNMT3A</i> | chr2:g.25469996           | c.1046C>A        | p.Ser349Ter     | new LoF<br><i>DNMT3A</i> | 1·58             | growing trajectory | B         | 15/949                                  |
| 406 | <i>DNMT3A</i> | chr2:g.25469996           | c.1046C>A        | p.Ser349Ter     | new LoF<br><i>DNMT3A</i> | 0·91             | growing trajectory | C         | 21/2302                                 |
| 406 | <i>DNMT3A</i> | chr2:g.25469996           | c.1046C>A        | p.Ser349Ter     | new LoF<br><i>DNMT3A</i> | 0·8              | growing trajectory | D         | 45/5629                                 |
| 406 | <i>DNMT3A</i> | chr2:g.25469996           | c.1046C>A        | p.Ser349Ter     | new LoF<br><i>DNMT3A</i> | 1·57             | growing trajectory | E         | 48/3056                                 |
| 406 | <i>TET2</i>   | chr4:g.106156747          | c.1711C>T        | p.Arg571Ter     | exact                    | 0·35             | static trajectory  | A         | 34/9697                                 |
| 406 | <i>TET2</i>   | chr4:g.106156747          | c.1711C>T        | p.Arg571Ter     | exact                    | 0·19             | static trajectory  | B         | 9/4640                                  |
| 406 | <i>TET2</i>   | chr4:g.106156747          | c.1711C>T        | p.Arg571Ter     | exact                    | 0·14             | static trajectory  | C         | 4/2792                                  |
| 406 | <i>TET2</i>   | chr4:g.106156747          | c.1711C>T        | p.Arg571Ter     | exact                    | 0·16             | static trajectory  | D         | 15/9572                                 |

|     |               |                   |           |             |             |      |                    |   |         |
|-----|---------------|-------------------|-----------|-------------|-------------|------|--------------------|---|---------|
| 407 | <i>BRCC3</i>  | chrX:g.154305512  | c.263A>G  | p.Asp88Gly  | new         | 0-92 | event              | C | 11/1194 |
| 407 | <i>DNMT3A</i> | chr2:g.25463308   | c.2185C>T | p.Arg729Trp | exact       | 0-23 | event              | C | 4/1709  |
| 407 | <i>DNMT3A</i> | chr2:g.25463308   | c.2185C>T | p.Arg729Trp | exact       | 0-52 | event              | D | 40/7645 |
| 407 | <i>GNAS</i>   | chr20:g.57484417  | c.2527T>C | p.Cys843Arg | new         | 0-09 | static trajectory  | A | 9/9833  |
| 407 | <i>GNAS</i>   | chr20:g.57484417  | c.2527T>C | p.Cys843Arg | new         | 0-77 | static trajectory  | C | 16/2087 |
| 407 | <i>GNAS</i>   | chr20:g.57484417  | c.2527T>C | p.Cys843Arg | new         | 0-08 | static trajectory  | D | 8/9796  |
| 407 | <i>NRAS</i>   | chr1:g.115258721  | c.61A>G   | p.Ile21Val  | new         | 1-19 | event              | C | 13/1091 |
| 408 | <i>BRCC3</i>  | chrX:g.154305512  | c.263A>G  | p.Asp88Gly  | new         | 0-69 | static trajectory  | A | 9/1309  |
| 408 | <i>BRCC3</i>  | chrX:g.154305512  | c.263A>G  | p.Asp88Gly  | new         | 0-44 | static trajectory  | B | 5/1146  |
| 408 | <i>BRCC3</i>  | chrX:g.154305512  | c.263A>G  | p.Asp88Gly  | new         | 0-38 | static trajectory  | C | 8/2129  |
| 408 | <i>DNMT3A</i> | chr2:g.25457243   | c.2644C>T | p.Arg882Cys | exact       | 0-64 | static trajectory  | A | 9/1416  |
| 408 | <i>DNMT3A</i> | chr2:g.25457243   | c.2644C>T | p.Arg882Cys | exact       | 0-74 | static trajectory  | B | 8/1082  |
| 408 | <i>DNMT3A</i> | chr2:g.25457243   | c.2644C>T | p.Arg882Cys | exact       | 0-32 | static trajectory  | C | 10/3127 |
| 408 | <i>DNMT3A</i> | chr2:g.25457243   | c.2644C>T | p.Arg882Cys | exact       | 0-49 | static trajectory  | E | 9/1836  |
| 408 | <i>GNAS</i>   | chr20:g.57484417  | c.2527T>C | p.Cys843Arg | new         | 0-44 | static trajectory  | A | 15/3387 |
| 408 | <i>GNAS</i>   | chr20:g.57484417  | c.2527T>C | p.Cys843Arg | new         | 0-62 | static trajectory  | B | 20/3213 |
| 408 | <i>GNAS</i>   | chr20:g.57484417  | c.2527T>C | p.Cys843Arg | new         | 0-64 | static trajectory  | C | 18/2800 |
| 408 | <i>GNAS</i>   | chr20:g.57484417  | c.2527T>C | p.Cys843Arg | new         | 0-32 | static trajectory  | D | 19/5934 |
| 408 | <i>GNAS</i>   | chr20:g.57484417  | c.2527T>C | p.Cys843Arg | new         | 0-26 | static trajectory  | E | 16/6130 |
| 408 | <i>NRAS</i>   | chr1:g.115258721  | c.61A>G   | p.Ile21Val  | new         | 0-93 | static trajectory  | A | 15/1619 |
| 408 | <i>NRAS</i>   | chr1:g.115258721  | c.61A>G   | p.Ile21Val  | new         | 1    | static trajectory  | B | 13/1297 |
| 408 | <i>NRAS</i>   | chr1:g.115258721  | c.61A>G   | p.Ile21Val  | new         | 0-56 | static trajectory  | C | 13/2333 |
| 408 | <i>NRAS</i>   | chr1:g.115258721  | c.61A>G   | p.Ile21Val  | new         | 0-31 | static trajectory  | D | 7/2259  |
| 408 | <i>NRAS</i>   | chr1:g.115258721  | c.61A>G   | p.Ile21Val  | new         | 0-44 | static trajectory  | E | 12/2729 |
| 408 | <i>TP53</i>   | chr17:g.7578410   | c.520A>G  | p.Arg174Gly | new         | 0-58 | event              | A | 6/1030  |
| 408 | <i>TP53</i>   | chr17:g.7578410   | c.520A>G  | p.Arg174Gly | new         | 1-09 | event              | B | 8/733   |
| 409 | <i>CBL</i>    | chr11:g.119148974 | c.1194C>A | p.His398Gln | overlapping | 0-65 | event              | C | 16/2445 |
| 409 | <i>CBL</i>    | chr11:g.119148974 | c.1194C>A | p.His398Gln | overlapping | 2-21 | event              | D | 51/2309 |
| 409 | <i>DNMT3A</i> | chr2:g.25470498   | c.976C>T  | p.Arg326Cys | exact       | 1-04 | growing trajectory | A | 15/1436 |
| 409 | <i>DNMT3A</i> | chr2:g.25470498   | c.976C>T  | p.Arg326Cys | exact       | 1-78 | growing trajectory | B | 42/2362 |

|     |               |                          |                  |                 |             |       |                    |   |           |
|-----|---------------|--------------------------|------------------|-----------------|-------------|-------|--------------------|---|-----------|
| 409 | <i>DNMT3A</i> | chr2:g.25470498          | c.976C>T         | p.Arg326Cys     | exact       | 1-66  | growing trajectory | C | 42/2536   |
| 409 | <i>DNMT3A</i> | chr2:g.25470498          | c.976C>T         | p.Arg326Cys     | exact       | 1-75  | growing trajectory | D | 50/2860   |
| 410 | <i>CBL</i>    | chr11:g.119148991        | c.1211G>A        | p.Cys404Tyr     | exact       | 3-21  | growing trajectory | A | 130/4049  |
| 410 | <i>CBL</i>    | chr11:g.119148991        | c.1211G>A        | p.Cys404Tyr     | exact       | 4-37  | growing trajectory | B | 67/1534   |
| 410 | <i>CBL</i>    | chr11:g.119148991        | c.1211G>A        | p.Cys404Tyr     | exact       | 28-94 | growing trajectory | C | 1145/3956 |
| 410 | <i>CBL</i>    | chr11:g.119148991        | c.1211G>A        | p.Cys404Tyr     | exact       | 35-44 | growing trajectory | D | 735/2074  |
| 410 | <i>CBL</i>    | chr11:g.119148991        | c.1211G>A        | p.Cys404Tyr     | exact       | 36-79 | growing trajectory | E | 2360/6415 |
| 410 | <i>DNMT3A</i> | chr2:g.25458605_25458606 | c.2567_2568delAG | p.Glu856Glyfs*7 | exact       | 0-31  | static trajectory  | A | 29/9463   |
| 410 | <i>DNMT3A</i> | chr2:g.25458605_25458606 | c.2567_2568delAG | p.Glu856Glyfs*7 | exact       | 0-43  | static trajectory  | B | 21/4907   |
| 410 | <i>DNMT3A</i> | chr2:g.25458605_25458606 | c.2567_2568delAG | p.Glu856Glyfs*7 | exact       | 0-77  | static trajectory  | C | 65/8413   |
| 410 | <i>DNMT3A</i> | chr2:g.25458605_25458606 | c.2567_2568delAG | p.Glu856Glyfs*7 | exact       | 0-25  | static trajectory  | D | 10/4066   |
| 410 | <i>DNMT3A</i> | chr2:g.25458605_25458606 | c.2567_2568delAG | p.Glu856Glyfs*7 | exact       | 0-1   | static trajectory  | E | 7/6794    |
| 410 | <i>DNMT3A</i> | chr2:g.25459831          | c.2452T>C        | p.Cys818Arg     | overlapping | 0-21  | event              | E | 16/7579   |
| 411 | <i>CBL</i>    | chr11:g.119149250        | c.1258C>T        | p.Arg420Ter     | overlapping | 0-05  | event              | C | 4/7855    |
| 411 | <i>CBL</i>    | chr11:g.119149250        | c.1258C>T        | p.Arg420Ter     | overlapping | 0-06  | event              | D | 6/9775    |
| 411 | <i>DNMT3A</i> | chr2:g.25470533          | c.941G>A         | p.Trp314Ter     | exact       | 4-48  | event              | E | 31/692    |
| 412 | <i>CBL</i>    | chr11:g.119149251        | c.1259G>A        | p.Arg420Gln     | exact       | 25-29 | growing trajectory | A | 1001/3958 |
| 412 | <i>CBL</i>    | chr11:g.119149251        | c.1259G>A        | p.Arg420Gln     | exact       | 26-2  | growing trajectory | B | 1426/5443 |
| 412 | <i>CBL</i>    | chr11:g.119149251        | c.1259G>A        | p.Arg420Gln     | exact       | 27-98 | growing trajectory | C | 479/1712  |
| 412 | <i>CBL</i>    | chr11:g.119149251        | c.1259G>A        | p.Arg420Gln     | exact       | 28-01 | growing trajectory | D | 2126/7591 |
| 412 | <i>DNMT3A</i> | chr2:g.25459831          | c.2452T>C        | p.Cys818Arg     | overlapping | 0-36  | event              | C | 7/1959    |
| 412 | <i>DNMT3A</i> | chr2:g.25459831          | c.2452T>C        | p.Cys818Arg     | overlapping | 0-25  | event              | D | 16/6463   |

|     |               |                  |           |             |                          |      |                       |   |          |
|-----|---------------|------------------|-----------|-------------|--------------------------|------|-----------------------|---|----------|
| 413 | <i>DNMT3A</i> | chr2:g.25457171  | c.2716A>T | p.Lys906Ter | new LoF<br><i>DNMT3A</i> | 0-11 | static trajectory     | C | 7/6646   |
| 413 | <i>DNMT3A</i> | chr2:g.25457171  | c.2716A>T | p.Lys906Ter | new LoF<br><i>DNMT3A</i> | 0-23 | static trajectory     | D | 15/6388  |
| 413 | <i>DNMT3A</i> | chr2:g.25457171  | c.2716A>T | p.Lys906Ter | new LoF<br><i>DNMT3A</i> | 0-18 | static trajectory     | E | 18/9776  |
| 413 | <i>DNMT3A</i> | chr2:g.25457242  | c.2645G>A | p.Arg882His | exact                    | 0-08 | growing<br>trajectory | A | 6/7935   |
| 413 | <i>DNMT3A</i> | chr2:g.25457242  | c.2645G>A | p.Arg882His | exact                    | 0-09 | growing<br>trajectory | B | 4/4545   |
| 413 | <i>DNMT3A</i> | chr2:g.25457242  | c.2645G>A | p.Arg882His | exact                    | 0-89 | growing<br>trajectory | C | 50/5608  |
| 413 | <i>DNMT3A</i> | chr2:g.25457242  | c.2645G>A | p.Arg882His | exact                    | 1-86 | growing<br>trajectory | D | 120/6469 |
| 413 | <i>DNMT3A</i> | chr2:g.25457242  | c.2645G>A | p.Arg882His | exact                    | 2-72 | growing<br>trajectory | E | 252/9268 |
| 413 | <i>DNMT3A</i> | chr2:g.25463286  | c.2207G>A | p.Arg736His | exact                    | 0-26 | static trajectory     | A | 10/3776  |
| 413 | <i>DNMT3A</i> | chr2:g.25463286  | c.2207G>A | p.Arg736His | exact                    | 1-22 | static trajectory     | C | 37/3023  |
| 413 | <i>DNMT3A</i> | chr2:g.25463286  | c.2207G>A | p.Arg736His | exact                    | 0-84 | static trajectory     | D | 28/3336  |
| 413 | <i>DNMT3A</i> | chr2:g.25463286  | c.2207G>A | p.Arg736His | exact                    | 0-59 | static trajectory     | E | 31/5250  |
| 413 | <i>SF3B1</i>  | chr2:g.198266827 | c.2105G>A | p.Arg702Gln | new                      | 0-08 | event                 | B | 8/9682   |
| 413 | <i>SF3B1</i>  | chr2:g.198266827 | c.2105G>A | p.Arg702Gln | new                      | 0-07 | event                 | C | 6/8378   |
| 413 | <i>TET2</i>   | chr4:g.106157714 | c.2678T>C | p.Val893Ala | new                      | 0-29 | event                 | A | 4/1389   |
| 413 | <i>TET2</i>   | chr4:g.106157714 | c.2678T>C | p.Val893Ala | new                      | 1-01 | event                 | E | 14/1388  |
| 414 | <i>DNMT3A</i> | chr2:g.25457176  | c.2711C>T | p.Pro904Leu | exact                    | 0-12 | static trajectory     | A | 11/8821  |
| 414 | <i>DNMT3A</i> | chr2:g.25457176  | c.2711C>T | p.Pro904Leu | exact                    | 0-11 | static trajectory     | B | 4/3707   |
| 414 | <i>DNMT3A</i> | chr2:g.25457176  | c.2711C>T | p.Pro904Leu | exact                    | 0-07 | static trajectory     | D | 7/9748   |
| 414 | <i>DNMT3A</i> | chr2:g.25457176  | c.2711C>T | p.Pro904Leu | exact                    | 0-07 | static trajectory     | E | 7/9709   |
| 414 | <i>IDH2</i>   | chr15:g.90631934 | c.419G>A  | p.Arg140Gln | exact                    | 0-07 | event                 | D | 7/9696   |
| 414 | <i>IDH2</i>   | chr15:g.90631934 | c.419G>A  | p.Arg140Gln | exact                    | 0-12 | event                 | E | 12/9716  |
| 414 | <i>SF3B1</i>  | chr2:g.198266827 | c.2105G>A | p.Arg702Gln | new                      | 0-06 | event                 | A | 6/9741   |
| 414 | <i>TET2</i>   | chr4:g.106156729 | c.1693C>T | p.Arg565Ter | new LoF <i>TET2</i>      | 0-07 | event                 | C | 7/9626   |
| 414 | <i>TET2</i>   | chr4:g.106156729 | c.1693C>T | p.Arg565Ter | new LoF <i>TET2</i>      | 0-06 | event                 | D | 6/9688   |
| 414 | <i>TET2</i>   | chr4:g.106157714 | c.2678T>C | p.Val893Ala | new                      | 0-23 | static trajectory     | A | 5/2132   |
| 414 | <i>TET2</i>   | chr4:g.106157714 | c.2678T>C | p.Val893Ala | new                      | 0-28 | static trajectory     | C | 13/4603  |

|     |               |                  |           |             |             |      |                    |   |          |
|-----|---------------|------------------|-----------|-------------|-------------|------|--------------------|---|----------|
| 414 | <i>TET2</i>   | chr4:g.106157714 | c.2678T>C | p.Val893Ala | new         | 0-34 | static trajectory  | D | 14/4097  |
| 415 | <i>DNMT3A</i> | chr2:g.25457176  | c.2711C>T | p.Pro904Leu | exact       | 0-05 | static trajectory  | B | 4/7626   |
| 415 | <i>DNMT3A</i> | chr2:g.25457176  | c.2711C>T | p.Pro904Leu | exact       | 0-11 | static trajectory  | C | 7/6329   |
| 415 | <i>DNMT3A</i> | chr2:g.25457176  | c.2711C>T | p.Pro904Leu | exact       | 0-11 | static trajectory  | D | 11/9586  |
| 415 | <i>DNMT3A</i> | chr2:g.25457243  | c.2644C>T | p.Arg882Cys | exact       | 0-15 | static trajectory  | B | 8/5419   |
| 415 | <i>DNMT3A</i> | chr2:g.25457243  | c.2644C>T | p.Arg882Cys | exact       | 0-12 | static trajectory  | C | 5/4214   |
| 415 | <i>DNMT3A</i> | chr2:g.25457243  | c.2644C>T | p.Arg882Cys | exact       | 0-2  | static trajectory  | D | 19/9385  |
| 415 | <i>IDH2</i>   | chr15:g.90631934 | c.419G>A  | p.Arg140Gln | exact       | 0-05 | event              | A | 4/8466   |
| 415 | <i>IDH2</i>   | chr15:g.90631934 | c.419G>A  | p.Arg140Gln | exact       | 0-1  | event              | B | 10/9704  |
| 415 | <i>TP53</i>   | chr17:g.7578178  | c.671A>T  | p.Glu224Val | overlapping | 0-07 | event              | D | 7/9454   |
| 416 | <i>DNMT3A</i> | chr2:g.25457242  | c.2645G>A | p.Arg882His | exact       | 0-16 | growing trajectory | A | 11/7054  |
| 416 | <i>DNMT3A</i> | chr2:g.25457242  | c.2645G>A | p.Arg882His | exact       | 0-19 | growing trajectory | B | 4/2144   |
| 416 | <i>DNMT3A</i> | chr2:g.25457242  | c.2645G>A | p.Arg882His | exact       | 0-58 | growing trajectory | C | 56/9657  |
| 416 | <i>DNMT3A</i> | chr2:g.25457242  | c.2645G>A | p.Arg882His | exact       | 0-64 | growing trajectory | D | 20/3117  |
| 416 | <i>DNMT3A</i> | chr2:g.25457242  | c.2645G>A | p.Arg882His | exact       | 0-8  | growing trajectory | E | 34/4262  |
| 416 | <i>DNMT3A</i> | chr2:g.25459831  | c.2452T>C | p.Cys818Arg | overlapping | 0-46 | event              | C | 31/6754  |
| 416 | <i>DNMT3A</i> | chr2:g.25459831  | c.2452T>C | p.Cys818Arg | overlapping | 0-44 | event              | D | 8/1803   |
| 416 | <i>DNMT3A</i> | chr2:g.25463184  | c.2309C>T | p.Ser770Leu | exact       | 2-03 | growing trajectory | A | 199/9808 |
| 416 | <i>DNMT3A</i> | chr2:g.25463184  | c.2309C>T | p.Ser770Leu | exact       | 2-33 | growing trajectory | B | 86/3686  |
| 416 | <i>DNMT3A</i> | chr2:g.25463184  | c.2309C>T | p.Ser770Leu | exact       | 2-87 | growing trajectory | C | 280/9749 |
| 416 | <i>DNMT3A</i> | chr2:g.25463184  | c.2309C>T | p.Ser770Leu | exact       | 3-08 | growing trajectory | D | 144/4682 |
| 416 | <i>DNMT3A</i> | chr2:g.25463184  | c.2309C>T | p.Ser770Leu | exact       | 2-82 | growing trajectory | E | 175/6198 |
| 416 | <i>DNMT3A</i> | chr2:g.25463286  | c.2207G>A | p.Arg736His | exact       | 0-59 | static trajectory  | A | 21/3544  |
| 416 | <i>DNMT3A</i> | chr2:g.25463286  | c.2207G>A | p.Arg736His | exact       | 0-89 | static trajectory  | C | 64/7188  |
| 416 | <i>DNMT3A</i> | chr2:g.25463286  | c.2207G>A | p.Arg736His | exact       | 0-89 | static trajectory  | D | 16/1798  |
| 416 | <i>DNMT3A</i> | chr2:g.25463286  | c.2207G>A | p.Arg736His | exact       | 0-71 | static trajectory  | E | 16/2268  |



|     |               |                  |            |                  |                     |      |                    |   |          |
|-----|---------------|------------------|------------|------------------|---------------------|------|--------------------|---|----------|
| 416 | <i>DNMT3A</i> | chr2:g.25469525  | c.1243C>T  | p.Gln415Ter      | exact               | 1-77 | growing trajectory | A | 29/1636  |
| 416 | <i>DNMT3A</i> | chr2:g.25469525  | c.1243C>T  | p.Gln415Ter      | exact               | 1-63 | growing trajectory | B | 9/551    |
| 416 | <i>DNMT3A</i> | chr2:g.25469525  | c.1243C>T  | p.Gln415Ter      | exact               | 4-09 | growing trajectory | C | 158/3860 |
| 416 | <i>DNMT3A</i> | chr2:g.25469525  | c.1243C>T  | p.Gln415Ter      | exact               | 4-25 | growing trajectory | D | 37/870   |
| 416 | <i>DNMT3A</i> | chr2:g.25469525  | c.1243C>T  | p.Gln415Ter      | exact               | 6-03 | growing trajectory | E | 61/1011  |
| 416 | <i>TET2</i>   | chr4:g.106156729 | c.1693C>T  | p.Arg565Ter      | new LoF <i>TET2</i> | 0-06 | event              | A | 6/9761   |
| 416 | <i>TET2</i>   | chr4:g.106156729 | c.1693C>T  | p.Arg565Ter      | new LoF <i>TET2</i> | 0-09 | event              | D | 5/5424   |
| 417 | <i>DNMT3A</i> | chr2:g.25457242  | c.2645G>A  | p.Arg882His      | exact               | 0-54 | static trajectory  | B | 15/2763  |
| 417 | <i>DNMT3A</i> | chr2:g.25457242  | c.2645G>A  | p.Arg882His      | exact               | 0-78 | static trajectory  | C | 22/2812  |
| 417 | <i>DNMT3A</i> | chr2:g.25457242  | c.2645G>A  | p.Arg882His      | exact               | 0-59 | static trajectory  | D | 19/3213  |
| 418 | <i>DNMT3A</i> | chr2:g.25457243  | c.2644C>T  | p.Arg882Cys      | exact               | 0-16 | static trajectory  | A | 14/8996  |
| 418 | <i>DNMT3A</i> | chr2:g.25457243  | c.2644C>T  | p.Arg882Cys      | exact               | 0-24 | static trajectory  | B | 8/3346   |
| 418 | <i>DNMT3A</i> | chr2:g.25457243  | c.2644C>T  | p.Arg882Cys      | exact               | 0-31 | static trajectory  | C | 16/5127  |
| 418 | <i>DNMT3A</i> | chr2:g.25457243  | c.2644C>T  | p.Arg882Cys      | exact               | 0-51 | static trajectory  | D | 26/5067  |
| 418 | <i>DNMT3A</i> | chr2:g.25457243  | c.2644C>T  | p.Arg882Cys      | exact               | 0-54 | static trajectory  | E | 31/5756  |
| 419 | <i>DNMT3A</i> | chr2:g.25457243  | c.2644C>T  | p.Arg882Cys      | exact               | 0-05 | growing trajectory | B | 3/5948   |
| 419 | <i>DNMT3A</i> | chr2:g.25457243  | c.2644C>T  | p.Arg882Cys      | exact               | 0-09 | growing trajectory | C | 5/5521   |
| 419 | <i>DNMT3A</i> | chr2:g.25457243  | c.2644C>T  | p.Arg882Cys      | exact               | 0-29 | growing trajectory | D | 28/9740  |
| 419 | <i>DNMT3A</i> | chr2:g.25457243  | c.2644C>T  | p.Arg882Cys      | exact               | 0-72 | growing trajectory | E | 9/1256   |
| 419 | <i>DNMT3A</i> | chr2:g.25469614  | c.1154delC | p.Pro385Argfs*22 | exact               | 1-25 | growing trajectory | B | 10/798   |
| 419 | <i>DNMT3A</i> | chr2:g.25469614  | c.1154delC | p.Pro385Argfs*22 | exact               | 2-26 | growing trajectory | C | 20/884   |
| 419 | <i>DNMT3A</i> | chr2:g.25469614  | c.1154delC | p.Pro385Argfs*22 | exact               | 4-45 | growing trajectory | D | 61/1371  |
| 420 | <i>DNMT3A</i> | chr2:g.25457243  | c.2644C>T  | p.Arg882Cys      | exact               | 1-18 | growing trajectory | A | 29/2460  |
| 420 | <i>DNMT3A</i> | chr2:g.25457243  | c.2644C>T  | p.Arg882Cys      | exact               | 1-07 | growing trajectory | B | 35/3260  |

|     |               |                          |                    |             |                       |      |                    |   |          |
|-----|---------------|--------------------------|--------------------|-------------|-----------------------|------|--------------------|---|----------|
| 420 | <i>DNMT3A</i> | chr2:g.25457243          | c.2644C>T          | p.Arg882Cys | exact                 | 2-37 | growing trajectory | C | 88/3711  |
| 420 | <i>DNMT3A</i> | chr2:g.25457243          | c.2644C>T          | p.Arg882Cys | exact                 | 2-98 | growing trajectory | D | 77/2584  |
| 420 | <i>GNAS</i>   | chr20:g.57484417         | c.2527T>C          | p.Cys843Arg | new                   | 0-13 | static trajectory  | A | 7/5367   |
| 420 | <i>GNAS</i>   | chr20:g.57484417         | c.2527T>C          | p.Cys843Arg | new                   | 0-05 | static trajectory  | B | 5/9263   |
| 420 | <i>GNAS</i>   | chr20:g.57484417         | c.2527T>C          | p.Cys843Arg | new                   | 0-53 | static trajectory  | D | 15/2835  |
| 421 | <i>DNMT3A</i> | chr2:g.25457249          | c.2638A>G          | p.Met880Val | exact                 | 0-5  | static trajectory  | A | 9/1817   |
| 421 | <i>DNMT3A</i> | chr2:g.25457249          | c.2638A>G          | p.Met880Val | exact                 | 0-4  | static trajectory  | B | 14/3460  |
| 421 | <i>DNMT3A</i> | chr2:g.25457249          | c.2638A>G          | p.Met880Val | exact                 | 0-58 | static trajectory  | C | 23/3985  |
| 421 | <i>DNMT3A</i> | chr2:g.25457249          | c.2638A>G          | p.Met880Val | exact                 | 0-61 | static trajectory  | D | 59/9724  |
| 421 | <i>GNAS</i>   | chr20:g.57484417         | c.2527T>C          | p.Cys843Arg | new                   | 0-63 | static trajectory  | A | 27/4301  |
| 421 | <i>GNAS</i>   | chr20:g.57484417         | c.2527T>C          | p.Cys843Arg | new                   | 0-16 | static trajectory  | B | 11/6879  |
| 421 | <i>GNAS</i>   | chr20:g.57484417         | c.2527T>C          | p.Cys843Arg | new                   | 0-31 | static trajectory  | C | 18/5892  |
| 421 | <i>NRAS</i>   | chr1:g.115258721         | c.61A>G            | p.Ile21Val  | new                   | 0-72 | static trajectory  | A | 15/2079  |
| 421 | <i>NRAS</i>   | chr1:g.115258721         | c.61A>G            | p.Ile21Val  | new                   | 0-34 | static trajectory  | B | 15/4443  |
| 421 | <i>NRAS</i>   | chr1:g.115258721         | c.61A>G            | p.Ile21Val  | new                   | 0-26 | static trajectory  | C | 11/4269  |
| 421 | <i>TET2</i>   | chr4:g.106156729         | c.1693C>T          | p.Arg565Ter | new LoF <i>TET2</i>   | 0-05 | event              | C | 5/9729   |
| 421 | <i>TET2</i>   | chr4:g.106156729         | c.1693C>T          | p.Arg565Ter | new LoF <i>TET2</i>   | 0-09 | event              | D | 9/9682   |
| 421 | <i>TP53</i>   | chr17:g.7578178          | c.671A>T           | p.Glu224Val | overlapping           | 0-09 | event              | D | 8/9067   |
| 422 | <i>DNMT3A</i> | chr2:g.25457249_25457252 | c.2635_2638delAACA | p.Asn879Ter | new LoF <i>DNMT3A</i> | 0-23 | static trajectory  | C | 17/7424  |
| 422 | <i>DNMT3A</i> | chr2:g.25457249_25457252 | c.2635_2638delAACA | p.Asn879Ter | new LoF <i>DNMT3A</i> | 0-3  | static trajectory  | D | 25/8281  |
| 422 | <i>DNMT3A</i> | chr2:g.25457249_25457252 | c.2635_2638delAACA | p.Asn879Ter | new LoF <i>DNMT3A</i> | 0-61 | static trajectory  | E | 59/9686  |
| 422 | <i>DNMT3A</i> | chr2:g.25459831          | c.2452T>C          | p.Cys818Arg | overlapping           | 0-08 | static trajectory  | C | 5/6118   |
| 422 | <i>DNMT3A</i> | chr2:g.25459831          | c.2452T>C          | p.Cys818Arg | overlapping           | 0-16 | static trajectory  | D | 12/7631  |
| 422 | <i>DNMT3A</i> | chr2:g.25459831          | c.2452T>C          | p.Cys818Arg | overlapping           | 0-1  | static trajectory  | E | 9/8863   |
| 423 | <i>DNMT3A</i> | chr2:g.25458684          | c.2489T>C          | p.Val830Ala | overlapping           | 0-72 | growing trajectory | A | 70/9680  |
| 423 | <i>DNMT3A</i> | chr2:g.25458684          | c.2489T>C          | p.Val830Ala | overlapping           | 1-72 | growing trajectory | B | 162/9428 |
| 423 | <i>DNMT3A</i> | chr2:g.25458684          | c.2489T>C          | p.Val830Ala | overlapping           | 3-04 | growing trajectory | C | 56/1841  |

|     |               |                  |           |             |             |      |                    |   |          |
|-----|---------------|------------------|-----------|-------------|-------------|------|--------------------|---|----------|
| 423 | <i>DNMT3A</i> | chr2:g.25458684  | c.2489T>C | p.Val830Ala | overlapping | 2-96 | growing trajectory | D | 45/1522  |
| 423 | <i>DNMT3A</i> | chr2:g.25458684  | c.2489T>C | p.Val830Ala | overlapping | 2-44 | growing trajectory | E | 156/6382 |
| 423 | <i>DNMT3A</i> | chr2:g.25459831  | c.2452T>C | p.Cys818Arg | overlapping | 0-53 | event              | E | 16/2999  |
| 423 | <i>DNMT3A</i> | chr2:g.25464534  | c.1979A>G | p.Tyr660Cys | exact       | 0-08 | growing trajectory | A | 8/9815   |
| 423 | <i>DNMT3A</i> | chr2:g.25464534  | c.1979A>G | p.Tyr660Cys | exact       | 0-17 | growing trajectory | B | 12/7242  |
| 423 | <i>DNMT3A</i> | chr2:g.25464534  | c.1979A>G | p.Tyr660Cys | exact       | 0-4  | growing trajectory | C | 5/1254   |
| 423 | <i>DNMT3A</i> | chr2:g.25464534  | c.1979A>G | p.Tyr660Cys | exact       | 0-96 | growing trajectory | D | 11/1141  |
| 423 | <i>DNMT3A</i> | chr2:g.25464534  | c.1979A>G | p.Tyr660Cys | exact       | 1-29 | growing trajectory | E | 46/3554  |
| 423 | <i>TET2</i>   | chr4:g.106156747 | c.1711C>T | p.Arg571Ter | exact       | 0-12 | event              | A | 12/9685  |
| 423 | <i>TET2</i>   | chr4:g.106156747 | c.1711C>T | p.Arg571Ter | exact       | 0-06 | event              | B | 6/9536   |
| 424 | <i>DNMT3A</i> | chr2:g.25459831  | c.2452T>C | p.Cys818Arg | overlapping | 0-18 | event              | D | 18/9747  |
| 424 | <i>DNMT3A</i> | chr2:g.25459831  | c.2452T>C | p.Cys818Arg | overlapping | 0-15 | event              | E | 5/3260   |
| 424 | <i>GNBI</i>   | chr1:g.1747229   | c.169A>G  | p.Lys57Glu  | exact       | 0-58 | static trajectory  | A | 47/8165  |
| 424 | <i>GNBI</i>   | chr1:g.1747229   | c.169A>G  | p.Lys57Glu  | exact       | 0-88 | static trajectory  | B | 50/5714  |
| 424 | <i>GNBI</i>   | chr1:g.1747229   | c.169A>G  | p.Lys57Glu  | exact       | 0-75 | static trajectory  | C | 73/9690  |
| 424 | <i>GNBI</i>   | chr1:g.1747229   | c.169A>G  | p.Lys57Glu  | exact       | 0-9  | static trajectory  | D | 88/9760  |
| 424 | <i>GNBI</i>   | chr1:g.1747229   | c.169A>G  | p.Lys57Glu  | exact       | 0-67 | static trajectory  | E | 33/4899  |
| 425 | <i>DNMT3A</i> | chr2:g.25459831  | c.2452T>C | p.Cys818Arg | overlapping | 0-37 | event              | D | 11/2951  |
| 425 | <i>DNMT3A</i> | chr2:g.25459831  | c.2452T>C | p.Cys818Arg | overlapping | 1-6  | event              | E | 14/873   |
| 426 | <i>DNMT3A</i> | chr2:g.25459831  | c.2452T>C | p.Cys818Arg | overlapping | 0-29 | event              | E | 19/6580  |
| 426 | <i>GNBI</i>   | chr1:g.1747229   | c.169A>G  | p.Lys57Glu  | exact       | 0-23 | growing trajectory | A | 15/6541  |
| 426 | <i>GNBI</i>   | chr1:g.1747229   | c.169A>G  | p.Lys57Glu  | exact       | 0-19 | growing trajectory | B | 12/6258  |
| 426 | <i>GNBI</i>   | chr1:g.1747229   | c.169A>G  | p.Lys57Glu  | exact       | 0-8  | growing trajectory | C | 54/6727  |
| 426 | <i>GNBI</i>   | chr1:g.1747229   | c.169A>G  | p.Lys57Glu  | exact       | 1-17 | growing trajectory | D | 113/9653 |
| 426 | <i>GNBI</i>   | chr1:g.1747229   | c.169A>G  | p.Lys57Glu  | exact       | 0-79 | growing trajectory | E | 76/9678  |

|     |               |                  |           |             |             |      |                    |   |         |
|-----|---------------|------------------|-----------|-------------|-------------|------|--------------------|---|---------|
| 426 | <i>TP53</i>   | chr17:g.7578178  | c.671A>T  | p.Glu224Val | overlapping | 0-06 | event              | E | 4/7222  |
| 427 | <i>DNMT3A</i> | chr2:g.25459831  | c.2452T>C | p.Cys818Arg | overlapping | 0-08 | growing trajectory | A | 4/4948  |
| 427 | <i>DNMT3A</i> | chr2:g.25459831  | c.2452T>C | p.Cys818Arg | overlapping | 0-36 | growing trajectory | C | 16/4481 |
| 427 | <i>DNMT3A</i> | chr2:g.25459831  | c.2452T>C | p.Cys818Arg | overlapping | 0-59 | growing trajectory | D | 25/4236 |
| 427 | <i>GNAS</i>   | chr20:g.57484417 | c.2527T>C | p.Cys843Arg | new         | 0-14 | static trajectory  | A | 4/4948  |
| 427 | <i>GNAS</i>   | chr20:g.57484417 | c.2527T>C | p.Cys843Arg | new         | 0-12 | static trajectory  | B | 16/4481 |
| 427 | <i>GNAS</i>   | chr20:g.57484417 | c.2527T>C | p.Cys843Arg | new         | 0-14 | static trajectory  | D | 25/4236 |
| 427 | <i>GNAS</i>   | chr20:g.57484421 | c.2531G>A | p.Arg844His | exact       | 0-43 | static trajectory  | A | 37/8606 |
| 427 | <i>GNAS</i>   | chr20:g.57484421 | c.2531G>A | p.Arg844His | exact       | 0-43 | static trajectory  | B | 22/5111 |
| 427 | <i>GNAS</i>   | chr20:g.57484421 | c.2531G>A | p.Arg844His | exact       | 0-41 | static trajectory  | C | 14/3431 |
| 427 | <i>GNAS</i>   | chr20:g.57484421 | c.2531G>A | p.Arg844His | exact       | 0-14 | static trajectory  | D | 4/2891  |
| 427 | <i>GNAS</i>   | chr20:g.57484421 | c.2531G>A | p.Arg844His | exact       | 0-2  | static trajectory  | E | 18/8971 |
| 428 | <i>DNMT3A</i> | chr2:g.25462068  | c.2339T>C | p.Ile780Thr | exact       | 0-33 | static trajectory  | C | 16/4888 |
| 428 | <i>DNMT3A</i> | chr2:g.25462068  | c.2339T>C | p.Ile780Thr | exact       | 0-78 | static trajectory  | D | 37/4750 |
| 428 | <i>DNMT3A</i> | chr2:g.25462068  | c.2339T>C | p.Ile780Thr | exact       | 0-75 | static trajectory  | E | 23/3082 |
| 428 | <i>IDH2</i>   | chr15:g.90631934 | c.419G>A  | p.Arg140Gln | exact       | 0-69 | static trajectory  | A | 66/9551 |
| 428 | <i>IDH2</i>   | chr15:g.90631934 | c.419G>A  | p.Arg140Gln | exact       | 0-95 | static trajectory  | B | 53/5586 |
| 428 | <i>IDH2</i>   | chr15:g.90631934 | c.419G>A  | p.Arg140Gln | exact       | 0-9  | static trajectory  | C | 87/9702 |
| 428 | <i>IDH2</i>   | chr15:g.90631934 | c.419G>A  | p.Arg140Gln | exact       | 0-87 | static trajectory  | D | 85/9715 |
| 428 | <i>IDH2</i>   | chr15:g.90631934 | c.419G>A  | p.Arg140Gln | exact       | 0-45 | static trajectory  | E | 40/8929 |
| 429 | <i>DNMT3A</i> | chr2:g.25462068  | c.2339T>C | p.Ile780Thr | exact       | 0-4  | growing trajectory | A | 10/2524 |
| 429 | <i>DNMT3A</i> | chr2:g.25462068  | c.2339T>C | p.Ile780Thr | exact       | 0-41 | growing trajectory | B | 13/3148 |
| 429 | <i>DNMT3A</i> | chr2:g.25462068  | c.2339T>C | p.Ile780Thr | exact       | 1-97 | growing trajectory | C | 54/2748 |
| 429 | <i>DNMT3A</i> | chr2:g.25463190  | c.2303A>G | p.Asp768Gly | overlapping | 0-04 | event              | B | 4/9599  |
| 429 | <i>DNMT3A</i> | chr2:g.25463190  | c.2303A>G | p.Asp768Gly | overlapping | 0-11 | event              | C | 8/7180  |
| 429 | <i>DNMT3A</i> | chr2:g.25466790  | c.1913C>T | p.Ser638Phe | exact       | 0-2  | event              | B | 9/4551  |
| 429 | <i>DNMT3A</i> | chr2:g.25466790  | c.1913C>T | p.Ser638Phe | exact       | 0-71 | event              | C | 19/2666 |
| 429 | <i>GNAS</i>   | chr20:g.57484417 | c.2527T>C | p.Cys843Arg | new         | 0-16 | event              | D | 16/9767 |

|     |               |                          |                   |             |                     |       |                      |   |           |
|-----|---------------|--------------------------|-------------------|-------------|---------------------|-------|----------------------|---|-----------|
| 429 | <i>TET2</i>   | chr4:g.106156729         | c.1693C>T         | p.Arg565Ter | new LoF <i>TET2</i> | 0-08  | event                | B | 8/9753    |
| 430 | <i>DNMT3A</i> | chr2:g.25463182          | c.2311C>T         | p.Arg771Ter | exact               | 0-65  | shrinking trajectory | A | 62/9570   |
| 430 | <i>DNMT3A</i> | chr2:g.25463182          | c.2311C>T         | p.Arg771Ter | exact               | 0-32  | shrinking trajectory | B | 24/7424   |
| 430 | <i>DNMT3A</i> | chr2:g.25463182          | c.2311C>T         | p.Arg771Ter | exact               | 0-38  | shrinking trajectory | C | 36/9419   |
| 430 | <i>DNMT3A</i> | chr2:g.25463182          | c.2311C>T         | p.Arg771Ter | exact               | 0-09  | shrinking trajectory | E | 9/9786    |
| 430 | <i>TET2</i>   | chr4:g.106156747         | c.1711C>T         | p.Arg571Ter | exact               | 0-09  | static trajectory    | A | 9/9726    |
| 430 | <i>TET2</i>   | chr4:g.106156747         | c.1711C>T         | p.Arg571Ter | exact               | 0-11  | static trajectory    | B | 9/8238    |
| 430 | <i>TET2</i>   | chr4:g.106156747         | c.1711C>T         | p.Arg571Ter | exact               | 0-16  | static trajectory    | C | 15/9575   |
| 430 | <i>TET2</i>   | chr4:g.106156747         | c.1711C>T         | p.Arg571Ter | exact               | 0-19  | static trajectory    | E | 18/9713   |
| 431 | <i>DNMT3A</i> | chr2:g.25463184          | c.2309C>T         | p.Ser770Leu | exact               | 0-16  | static trajectory    | A | 11/6968   |
| 431 | <i>DNMT3A</i> | chr2:g.25463184          | c.2309C>T         | p.Ser770Leu | exact               | 0-13  | static trajectory    | B | 13/9757   |
| 431 | <i>DNMT3A</i> | chr2:g.25463184          | c.2309C>T         | p.Ser770Leu | exact               | 0-23  | static trajectory    | C | 14/5966   |
| 431 | <i>DNMT3A</i> | chr2:g.25463184          | c.2309C>T         | p.Ser770Leu | exact               | 0-17  | static trajectory    | D | 14/8074   |
| 431 | <i>DNMT3A</i> | chr2:g.25463184          | c.2309C>T         | p.Ser770Leu | exact               | 0-11  | static trajectory    | E | 11/9786   |
| 431 | <i>DNMT3A</i> | chr2:g.25463298_25463300 | c.2193_2195delCTT | p.Phe732del | exact               | 0-4   | static trajectory    | A | 12/3017   |
| 431 | <i>DNMT3A</i> | chr2:g.25463298_25463300 | c.2193_2195delCTT | p.Phe732del | exact               | 0-27  | static trajectory    | B | 12/4402   |
| 431 | <i>DNMT3A</i> | chr2:g.25463298_25463300 | c.2193_2195delCTT | p.Phe732del | exact               | 0-36  | static trajectory    | D | 17/4690   |
| 431 | <i>DNMT3A</i> | chr2:g.25463298_25463300 | c.2193_2195delCTT | p.Phe732del | exact               | 0-13  | static trajectory    | E | 7/5538    |
| 431 | <i>DNMT3A</i> | chr2:g.25463299          | c.2194T>A         | p.Phe732Ile | exact               | 0-51  | growing trajectory   | A | 20/3916   |
| 431 | <i>DNMT3A</i> | chr2:g.25463299          | c.2194T>A         | p.Phe732Ile | exact               | 1-33  | growing trajectory   | B | 81/6081   |
| 431 | <i>DNMT3A</i> | chr2:g.25463299          | c.2194T>A         | p.Phe732Ile | exact               | 12-27 | growing trajectory   | C | 535/4362  |
| 431 | <i>DNMT3A</i> | chr2:g.25463299          | c.2194T>A         | p.Phe732Ile | exact               | 24-87 | growing trajectory   | D | 1615/6495 |
| 431 | <i>DNMT3A</i> | chr2:g.25463299          | c.2194T>A         | p.Phe732Ile | exact               | 35-02 | growing trajectory   | E | 2808/8019 |
| 431 | <i>TET2</i>   | chr4:g.106157653         | c.2617G>T         | p.Glu873Ter | new LoF <i>TET2</i> | 0-16  | growing trajectory   | A | 9/5734    |

|     |               |                          |                   |             |                     |       |                    |   |           |
|-----|---------------|--------------------------|-------------------|-------------|---------------------|-------|--------------------|---|-----------|
| 431 | <i>TET2</i>   | chr4:g.106157653         | c.2617G>T         | p.Glu873Ter | new LoF <i>TET2</i> | 0-86  | growing trajectory | B | 56/6479   |
| 431 | <i>TET2</i>   | chr4:g.106157653         | c.2617G>T         | p.Glu873Ter | new LoF <i>TET2</i> | 10-58 | growing trajectory | C | 470/4443  |
| 431 | <i>TET2</i>   | chr4:g.106157653         | c.2617G>T         | p.Glu873Ter | new LoF <i>TET2</i> | 25-28 | growing trajectory | D | 1768/6994 |
| 431 | <i>TET2</i>   | chr4:g.106157653         | c.2617G>T         | p.Glu873Ter | new LoF <i>TET2</i> | 37-1  | growing trajectory | E | 2569/6924 |
| 432 | <i>DNMT3A</i> | chr2:g.25463190          | c.2303A>G         | p.Asp768Gly | overlapping         | 0-1   | event              | C | 9/8710    |
| 432 | <i>DNMT3A</i> | chr2:g.25463190          | c.2303A>G         | p.Asp768Gly | overlapping         | 0-06  | event              | E | 6/9810    |
| 432 | <i>DNMT3A</i> | chr2:g.25463576          | c.2106T>G         | p.Asp702Glu | exact               | 1-1   | static trajectory  | A | 55/5019   |
| 432 | <i>DNMT3A</i> | chr2:g.25463576          | c.2106T>G         | p.Asp702Glu | exact               | 1-47  | static trajectory  | B | 33/2242   |
| 432 | <i>DNMT3A</i> | chr2:g.25463576          | c.2106T>G         | p.Asp702Glu | exact               | 2-85  | static trajectory  | C | 76/2663   |
| 432 | <i>DNMT3A</i> | chr2:g.25463576          | c.2106T>G         | p.Asp702Glu | exact               | 1-11  | static trajectory  | E | 54/4856   |
| 432 | <i>DNMT3A</i> | chr2:g.25467173_25467175 | c.1700_1702delTGG | p.Val567del | new                 | 2-9   | event              | E | 161/5554  |
| 432 | <i>GNBI</i>   | chr1:g.1747229           | c.169A>G          | p.Lys57Glu  | exact               | 2-06  | growing trajectory | A | 199/9679  |
| 432 | <i>GNBI</i>   | chr1:g.1747229           | c.169A>G          | p.Lys57Glu  | exact               | 1-76  | growing trajectory | B | 81/4600   |
| 432 | <i>GNBI</i>   | chr1:g.1747229           | c.169A>G          | p.Lys57Glu  | exact               | 4-41  | growing trajectory | C | 191/4328  |
| 432 | <i>GNBI</i>   | chr1:g.1747229           | c.169A>G          | p.Lys57Glu  | exact               | 21-98 | growing trajectory | E | 1522/6924 |
| 432 | <i>TET2</i>   | chr4:g.106156729         | c.1693C>T         | p.Arg565Ter | new LoF <i>TET2</i> | 0-05  | event              | A | 5/9772    |
| 433 | <i>DNMT3A</i> | chr2:g.25463286          | c.2207G>A         | p.Arg736His | exact               | 0-46  | static trajectory  | C | 17/3690   |
| 433 | <i>DNMT3A</i> | chr2:g.25463286          | c.2207G>A         | p.Arg736His | exact               | 0-63  | static trajectory  | D | 24/3790   |
| 433 | <i>DNMT3A</i> | chr2:g.25463286          | c.2207G>A         | p.Arg736His | exact               | 0-93  | static trajectory  | E | 56/5991   |
| 433 | <i>DNMT3A</i> | chr2:g.25470516          | c.958C>T          | p.Arg320Ter | exact               | 0-39  | static trajectory  | C | 13/3332   |
| 433 | <i>DNMT3A</i> | chr2:g.25470516          | c.958C>T          | p.Arg320Ter | exact               | 0-53  | static trajectory  | D | 16/3000   |
| 433 | <i>DNMT3A</i> | chr2:g.25470516          | c.958C>T          | p.Arg320Ter | exact               | 0-74  | static trajectory  | E | 38/5153   |
| 434 | <i>DNMT3A</i> | chr2:g.25463287          | c.2206C>G         | p.Arg736Gly | exact               | 0-67  | growing trajectory | A | 14/2087   |
| 434 | <i>DNMT3A</i> | chr2:g.25463287          | c.2206C>G         | p.Arg736Gly | exact               | 0-55  | growing trajectory | B | 8/1450    |
| 434 | <i>DNMT3A</i> | chr2:g.25463287          | c.2206C>G         | p.Arg736Gly | exact               | 2-22  | growing trajectory | C | 86/3874   |

|     |               |                  |           |             |       |      |                    |   |         |
|-----|---------------|------------------|-----------|-------------|-------|------|--------------------|---|---------|
| 434 | <i>DNMT3A</i> | chr2:g.25463287  | c.2206C>G | p.Arg736Gly | exact | 1-93 | growing trajectory | D | 50/2596 |
| 434 | <i>DNMT3A</i> | chr2:g.25467083  | c.1792C>T | p.Arg598Ter | exact | 0-43 | static trajectory  | A | 10/2340 |
| 434 | <i>DNMT3A</i> | chr2:g.25467083  | c.1792C>T | p.Arg598Ter | exact | 0-53 | static trajectory  | B | 11/2071 |
| 434 | <i>DNMT3A</i> | chr2:g.25467083  | c.1792C>T | p.Arg598Ter | exact | 0-82 | static trajectory  | C | 36/4379 |
| 434 | <i>DNMT3A</i> | chr2:g.25467083  | c.1792C>T | p.Arg598Ter | exact | 0-62 | static trajectory  | D | 12/1925 |
| 434 | <i>JAK2</i>   | chr9:g.5073770   | c.1849G>T | p.Val617Phe | exact | 0-15 | growing trajectory | A | 14/9239 |
| 434 | <i>JAK2</i>   | chr9:g.5073770   | c.1849G>T | p.Val617Phe | exact | 0-23 | growing trajectory | B | 9/3905  |
| 434 | <i>JAK2</i>   | chr9:g.5073770   | c.1849G>T | p.Val617Phe | exact | 0-23 | growing trajectory | C | 23/9829 |
| 434 | <i>JAK2</i>   | chr9:g.5073770   | c.1849G>T | p.Val617Phe | exact | 0-66 | growing trajectory | D | 36/5491 |
| 435 | <i>DNMT3A</i> | chr2:g.25463289  | c.2204A>G | p.Tyr735Cys | exact | 0-3  | static trajectory  | A | 13/4334 |
| 435 | <i>DNMT3A</i> | chr2:g.25463289  | c.2204A>G | p.Tyr735Cys | exact | 0-55 | static trajectory  | D | 3/545   |
| 435 | <i>DNMT3A</i> | chr2:g.25463289  | c.2204A>G | p.Tyr735Cys | exact | 0-34 | static trajectory  | E | 12/3524 |
| 436 | <i>DNMT3A</i> | chr2:g.25463289  | c.2204A>G | p.Tyr735Cys | exact | 0-61 | growing trajectory | A | 19/3136 |
| 436 | <i>DNMT3A</i> | chr2:g.25463289  | c.2204A>G | p.Tyr735Cys | exact | 0-81 | growing trajectory | B | 15/1857 |
| 436 | <i>DNMT3A</i> | chr2:g.25463289  | c.2204A>G | p.Tyr735Cys | exact | 1-03 | growing trajectory | C | 39/3780 |
| 436 | <i>DNMT3A</i> | chr2:g.25463289  | c.2204A>G | p.Tyr735Cys | exact | 1-03 | growing trajectory | D | 48/4660 |
| 436 | <i>DNMT3A</i> | chr2:g.25463289  | c.2204A>G | p.Tyr735Cys | exact | 1-15 | growing trajectory | E | 77/6698 |
| 436 | <i>TET2</i>   | chr4:g.106157714 | c.2678T>C | p.Val893Ala | new   | 0-33 | event              | D | 9/2733  |
| 437 | <i>DNMT3A</i> | chr2:g.25463289  | c.2204A>G | p.Tyr735Cys | exact | 0-27 | event              | C | 6/2229  |
| 437 | <i>DNMT3A</i> | chr2:g.25463289  | c.2204A>G | p.Tyr735Cys | exact | 0-32 | event              | D | 19/5992 |
| 437 | <i>DNMT3A</i> | chr2:g.25463308  | c.2185C>T | p.Arg729Trp | exact | 0-19 | growing trajectory | B | 6/3208  |
| 437 | <i>DNMT3A</i> | chr2:g.25463308  | c.2185C>T | p.Arg729Trp | exact | 0-15 | growing trajectory | C | 6/4111  |
| 437 | <i>DNMT3A</i> | chr2:g.25463308  | c.2185C>T | p.Arg729Trp | exact | 0-74 | growing trajectory | D | 72/9673 |
| 437 | <i>GNAS</i>   | chr20:g.57484417 | c.2527T>C | p.Cys843Arg | new   | 0-08 | static trajectory  | A | 5/6530  |

|     |               |                          |            |                  |             |      |                    |   |          |
|-----|---------------|--------------------------|------------|------------------|-------------|------|--------------------|---|----------|
| 437 | <i>GNAS</i>   | chr20:g.57484417         | c.2527T>C  | p.Cys843Arg      | new         | 0-41 | static trajectory  | B | 26/6366  |
| 437 | <i>GNAS</i>   | chr20:g.57484417         | c.2527T>C  | p.Cys843Arg      | new         | 0-39 | static trajectory  | C | 24/6145  |
| 437 | <i>IDH2</i>   | chr15:g.90631934         | c.419G>T   | p.Arg140Leu      | overlapping | 0-16 | growing trajectory | B | 10/6325  |
| 437 | <i>IDH2</i>   | chr15:g.90631934         | c.419G>T   | p.Arg140Leu      | overlapping | 0-52 | growing trajectory | C | 31/6004  |
| 437 | <i>IDH2</i>   | chr15:g.90631934         | c.419G>T   | p.Arg140Leu      | overlapping | 0-68 | growing trajectory | D | 65/9590  |
| 437 | <i>NRAS</i>   | chr1:g.115258721         | c.61A>G    | p.Ile21Val       | new         | 0-16 | static trajectory  | A | 4/2579   |
| 437 | <i>NRAS</i>   | chr1:g.115258721         | c.61A>G    | p.Ile21Val       | new         | 0-4  | static trajectory  | B | 15/3731  |
| 437 | <i>NRAS</i>   | chr1:g.115258721         | c.61A>G    | p.Ile21Val       | new         | 0-48 | static trajectory  | C | 21/4408  |
| 437 | <i>NRAS</i>   | chr1:g.115258721         | c.61A>G    | p.Ile21Val       | new         | 0-06 | static trajectory  | D | 6/9657   |
| 438 | <i>DNMT3A</i> | chr2:g.25463289          | c.2204A>G  | p.Tyr735Cys      | exact       | 1-09 | growing trajectory | A | 19/1746  |
| 438 | <i>DNMT3A</i> | chr2:g.25463289          | c.2204A>G  | p.Tyr735Cys      | exact       | 1-21 | growing trajectory | B | 14/1160  |
| 438 | <i>DNMT3A</i> | chr2:g.25463289          | c.2204A>G  | p.Tyr735Cys      | exact       | 1-88 | growing trajectory | C | 33/1752  |
| 438 | <i>DNMT3A</i> | chr2:g.25463289          | c.2204A>G  | p.Tyr735Cys      | exact       | 1-95 | growing trajectory | D | 45/2309  |
| 439 | <i>DNMT3A</i> | chr2:g.25463289          | c.2204A>G  | p.Tyr735Cys      | exact       | 0-13 | growing trajectory | A | 7/5274   |
| 439 | <i>DNMT3A</i> | chr2:g.25463289          | c.2204A>G  | p.Tyr735Cys      | exact       | 0-5  | growing trajectory | B | 18/3624  |
| 439 | <i>DNMT3A</i> | chr2:g.25463289          | c.2204A>G  | p.Tyr735Cys      | exact       | 0-66 | growing trajectory | C | 9/1372   |
| 439 | <i>DNMT3A</i> | chr2:g.25469167_25469168 | c.1290dupT | p.Pro431Serfs*14 | exact       | 0-32 | growing trajectory | A | 24/7489  |
| 439 | <i>DNMT3A</i> | chr2:g.25469167_25469168 | c.1290dupT | p.Pro431Serfs*14 | exact       | 0-51 | growing trajectory | B | 26/5065  |
| 439 | <i>DNMT3A</i> | chr2:g.25469167_25469168 | c.1290dupT | p.Pro431Serfs*14 | exact       | 3-42 | growing trajectory | C | 62/1812  |
| 439 | <i>DNMT3A</i> | chr2:g.25469167_25469168 | c.1290dupT | p.Pro431Serfs*14 | exact       | 8-6  | growing trajectory | D | 181/2105 |
| 440 | <i>DNMT3A</i> | chr2:g.25463308          | c.2185C>T  | p.Arg729Trp      | exact       | 1-29 | static trajectory  | A | 62/4799  |
| 440 | <i>DNMT3A</i> | chr2:g.25463308          | c.2185C>T  | p.Arg729Trp      | exact       | 1-28 | static trajectory  | C | 78/6076  |
| 440 | <i>DNMT3A</i> | chr2:g.25463308          | c.2185C>T  | p.Arg729Trp      | exact       | 1    | static trajectory  | D | 30/3013  |



|     |               |                  |           |             |       |       |                      |   |          |
|-----|---------------|------------------|-----------|-------------|-------|-------|----------------------|---|----------|
| 440 | <i>DNMT3A</i> | chr2:g.25466767  | c.1936G>A | p.Gly646Arg | exact | 2-33  | shrinking trajectory | A | 97/4157  |
| 440 | <i>DNMT3A</i> | chr2:g.25466767  | c.1936G>A | p.Gly646Arg | exact | 2-59  | shrinking trajectory | C | 102/3935 |
| 440 | <i>DNMT3A</i> | chr2:g.25466767  | c.1936G>A | p.Gly646Arg | exact | 0-97  | shrinking trajectory | D | 24/2475  |
| 440 | <i>GNAS</i>   | chr20:g.57484417 | c.2527T>C | p.Cys843Arg | new   | 0-3   | event                | C | 21/7028  |
| 440 | <i>GNAS</i>   | chr20:g.57484417 | c.2527T>C | p.Cys843Arg | new   | 0-21  | event                | D | 19/9258  |
| 440 | <i>NRAS</i>   | chr1:g.115258721 | c.61A>G   | p.Ile21Val  | new   | 0-06  | static trajectory    | A | 5/8150   |
| 440 | <i>NRAS</i>   | chr1:g.115258721 | c.61A>G   | p.Ile21Val  | new   | 0-5   | static trajectory    | C | 26/5177  |
| 440 | <i>NRAS</i>   | chr1:g.115258721 | c.61A>G   | p.Ile21Val  | new   | 0-19  | static trajectory    | D | 8/4324   |
| 440 | <i>TP53</i>   | chr17:g.7578410  | c.520A>G  | p.Arg174Gly | new   | 0-12  | static trajectory    | A | 5/4244   |
| 440 | <i>TP53</i>   | chr17:g.7578410  | c.520A>G  | p.Arg174Gly | new   | 0-26  | static trajectory    | C | 13/5006  |
| 440 | <i>TP53</i>   | chr17:g.7578410  | c.520A>G  | p.Arg174Gly | new   | 0-34  | static trajectory    | D | 8/2387   |
| 441 | <i>DNMT3A</i> | chr2:g.25463588  | c.2094G>A | p.Trp698Ter | exact | 11-41 | shrinking trajectory | A | 174/1525 |
| 441 | <i>DNMT3A</i> | chr2:g.25463588  | c.2094G>A | p.Trp698Ter | exact | 10-79 | shrinking trajectory | B | 224/2076 |
| 441 | <i>DNMT3A</i> | chr2:g.25463588  | c.2094G>A | p.Trp698Ter | exact | 7-77  | shrinking trajectory | C | 130/1674 |
| 441 | <i>DNMT3A</i> | chr2:g.25463588  | c.2094G>A | p.Trp698Ter | exact | 6-11  | shrinking trajectory | D | 99/1619  |
| 442 | <i>GNAS</i>   | chr20:g.57484417 | c.2527T>C | p.Cys843Arg | new   | 0-15  | event                | E | 15/9762  |
| 442 | <i>JAK2</i>   | chr9:g.5073770   | c.1849G>T | p.Val617Phe | exact | 1-3   | shrinking trajectory | A | 128/9848 |
| 442 | <i>JAK2</i>   | chr9:g.5073770   | c.1849G>T | p.Val617Phe | exact | 0-9   | shrinking trajectory | B | 64/7117  |
| 442 | <i>JAK2</i>   | chr9:g.5073770   | c.1849G>T | p.Val617Phe | exact | 0-64  | shrinking trajectory | C | 5/787    |
| 442 | <i>JAK2</i>   | chr9:g.5073770   | c.1849G>T | p.Val617Phe | exact | 0-33  | shrinking trajectory | D | 11/3326  |
| 442 | <i>JAK2</i>   | chr9:g.5073770   | c.1849G>T | p.Val617Phe | exact | 0-11  | shrinking trajectory | E | 11/9650  |
| 442 | <i>TP53</i>   | chr17:g.7578410  | c.520A>G  | p.Arg174Gly | new   | 0-22  | event                | D | 7/3217   |
| 443 | <i>GNAS</i>   | chr20:g.57484421 | c.2531G>A | p.Arg844His | exact | 0-83  | growing trajectory   | A | 67/8079  |
| 443 | <i>GNAS</i>   | chr20:g.57484421 | c.2531G>A | p.Arg844His | exact | 0-98  | growing trajectory   | B | 68/6932  |

|     |             |                  |           |             |       |       |                      |   |           |
|-----|-------------|------------------|-----------|-------------|-------|-------|----------------------|---|-----------|
| 443 | <i>GNAS</i> | chr20:g.57484421 | c.2531G>A | p.Arg844His | exact | 1·61  | growing trajectory   | C | 29/1802   |
| 443 | <i>GNAS</i> | chr20:g.57484421 | c.2531G>A | p.Arg844His | exact | 3·56  | growing trajectory   | D | 69/1937   |
| 444 | <i>GNB1</i> | chr1:g.1747229   | c.169A>G  | p.Lys57Glu  | exact | 3·27  | shrinking trajectory | A | 202/6186  |
| 444 | <i>GNB1</i> | chr1:g.1747229   | c.169A>G  | p.Lys57Glu  | exact | 4·32  | shrinking trajectory | B | 244/5654  |
| 444 | <i>GNB1</i> | chr1:g.1747229   | c.169A>G  | p.Lys57Glu  | exact | 3·24  | shrinking trajectory | C | 205/6327  |
| 444 | <i>GNB1</i> | chr1:g.1747229   | c.169A>G  | p.Lys57Glu  | exact | 3·27  | shrinking trajectory | D | 29/887    |
| 444 | <i>GNB1</i> | chr1:g.1747229   | c.169A>G  | p.Lys57Glu  | exact | 1·48  | shrinking trajectory | E | 33/2224   |
| 445 | <i>JAK2</i> | chr9:g.5073770   | c.1849G>T | p.Val617Phe | exact | 2·47  | growing trajectory   | A | 233/9430  |
| 445 | <i>JAK2</i> | chr9:g.5073770   | c.1849G>T | p.Val617Phe | exact | 5·16  | growing trajectory   | B | 366/7089  |
| 445 | <i>JAK2</i> | chr9:g.5073770   | c.1849G>T | p.Val617Phe | exact | 16·94 | growing trajectory   | C | 1572/9278 |
| 445 | <i>JAK2</i> | chr9:g.5073770   | c.1849G>T | p.Val617Phe | exact | 22·85 | growing trajectory   | D | 745/3260  |
| 445 | <i>JAK2</i> | chr9:g.5073770   | c.1849G>T | p.Val617Phe | exact | 25·2  | growing trajectory   | E | 530/2103  |

a) CHDMs in the literature are listed in Table S4a

b) We cannot exclude that some detected somatic mutations with very low VAF are false positives

c) Average variant and total read counts for PCR1 and PCR2. Generated by mpileups of all non-error-corrected reads; insertions and deletions are manually checked for read counts in the IGV browser

# Supplemental Figures

**a**

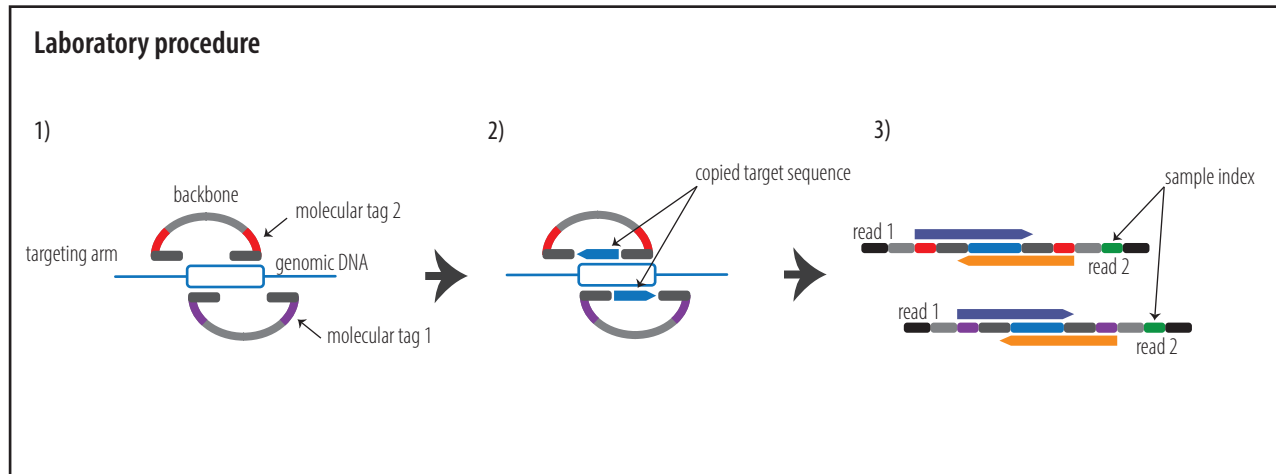

**b**

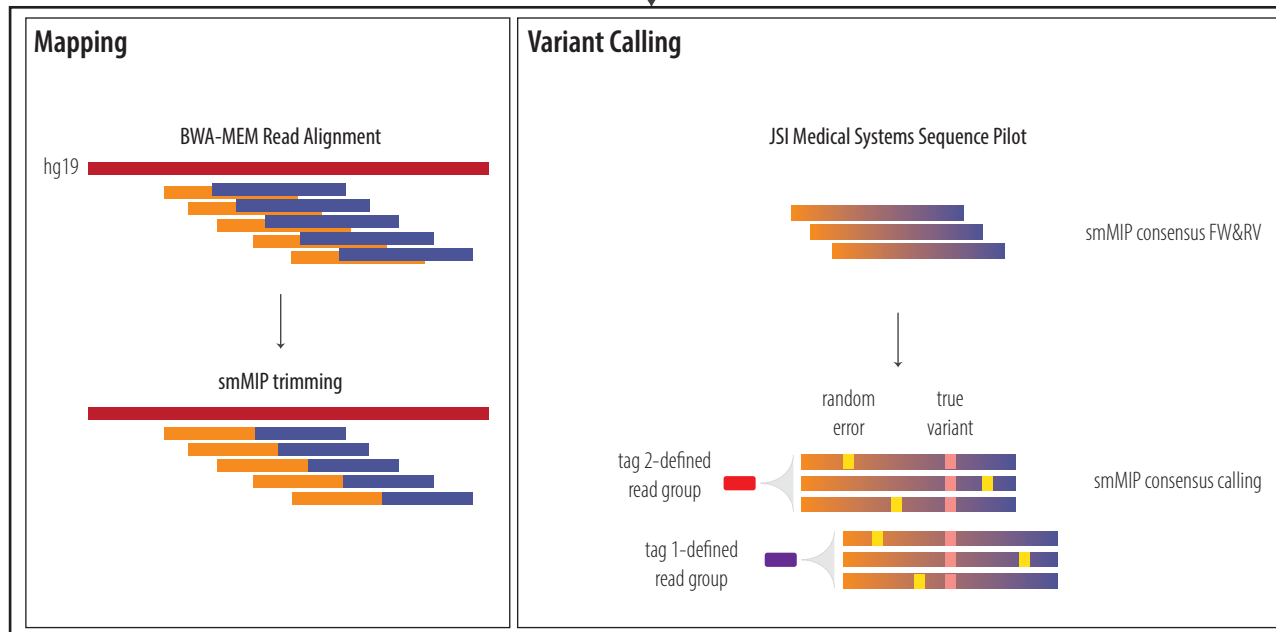

**c**

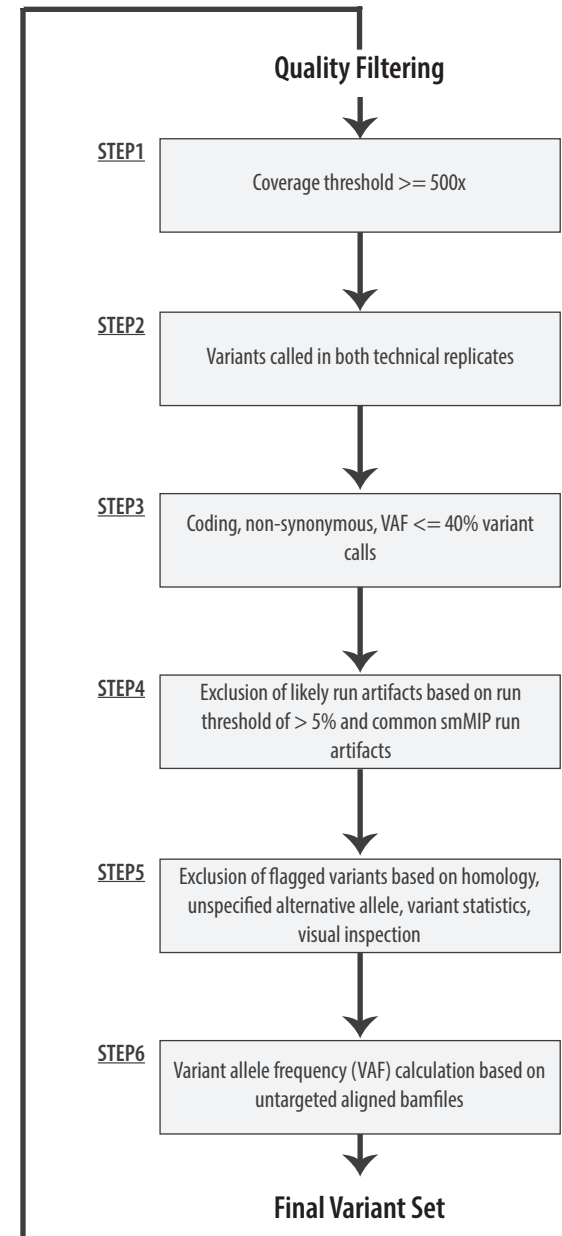

**Figure S1: smMIP workflow.** (a) (adapted from Hiatt et. al. 2013) smMIP insert-sizes were shortened to 54nt to enable full forward and reverse read coverage (double sequencing of each insert), target-sequences were generally targeted by at least two independent smMIP-probes (double tiling), and each smMIP capture underwent two independently barcoded PCR-reactions (double PCR replicates). Sequencing was performed using the Illumina NextSeq 500 system. (b) (adapted from Hiatt et. al. 2013) Raw sequencing data was converted to FastQ-files after which two independent data processing strategies were applied. Mapping: FastQ-file reads were aligned to the reference genome (Hg19) with BWA-MEM after which the overlap between Forward (FW) and Reverse (RV) reads was trimmed off (smMIP trimming). Variant Calling: FastQ-files were imported in JSI Medical Systems Sequence Pilot in which first a consensus between FW and RV reads is determined (smMIP consensus FW&RV), after which tag-defined read groups enable smMIP consensus calling. (c) The aligned reads and resulting variant calls are then subjected to a stringent quality filtering pipeline. First, individuals with an average sequencing depth <500x are excluded (STEP1). Second, only variants called in both technical replicates are kept (STEP2). Third, coding, non-synonymous variant calls with a Variant Allele Frequency (VAF)  $\leq 40\%$  are kept (STEP3). Fourth, likely run-specific artifacts (variant calls in  $> 5\%$  of samples per run) are excluded (STEP4). Fifth, exclusion of variants based on homology, unspecified alternative allele, variant statistics, and visual inspection (STEP5). And finally, for each variant position we generated mpileups based on the aligned reads to determine the final VAF for each CHDM (STEP6).

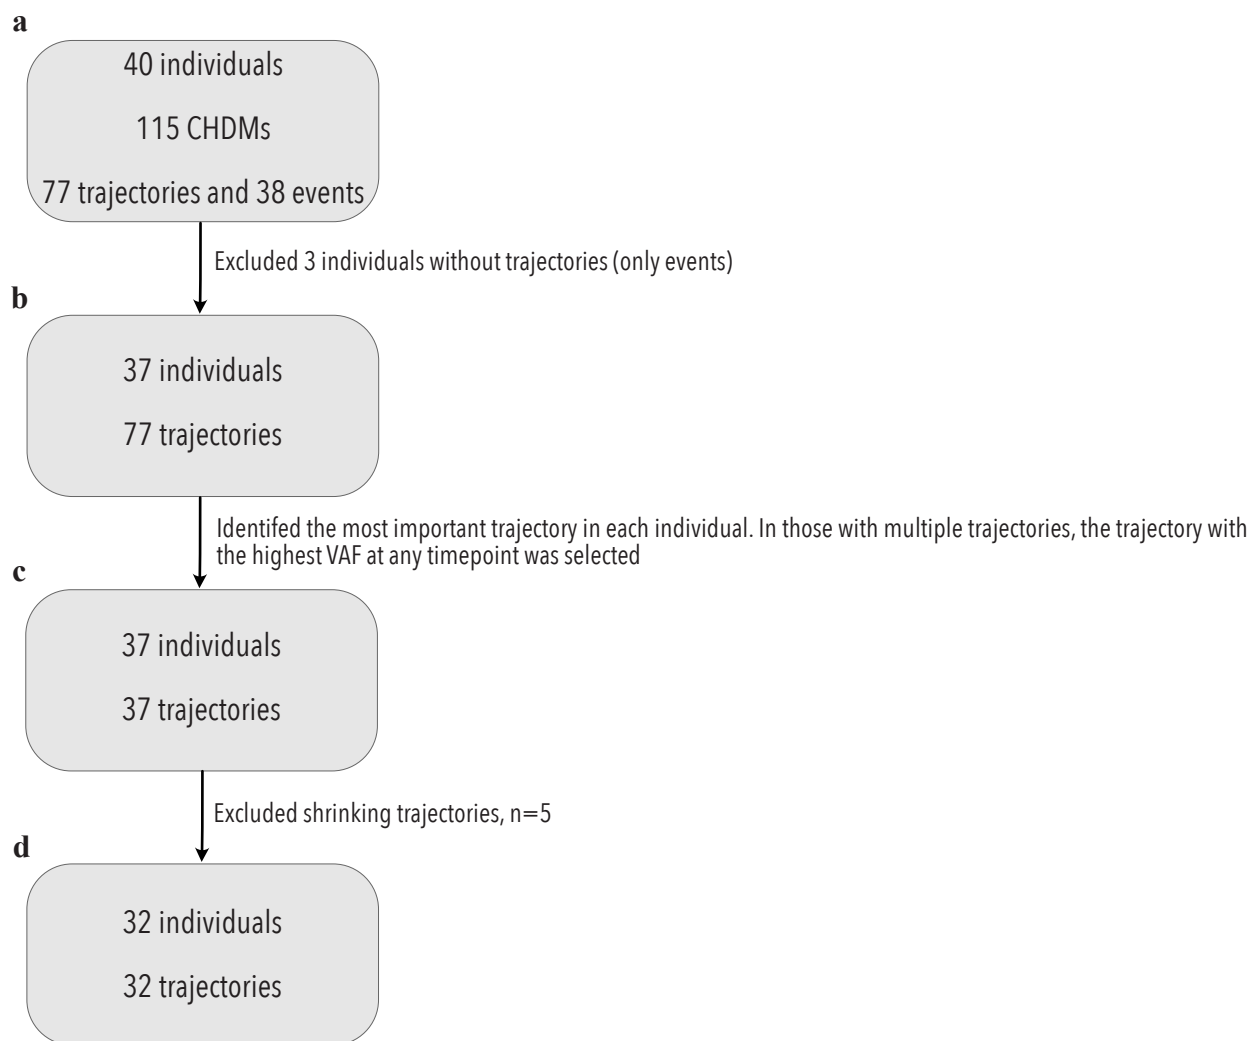

**Figure S2: Trajectory selection flowchart. (a)** In the 40 individuals in our multiple-timepoint obesity dataset, we identified 115 candidate clonal haematopoiesis driver mutations (CHDMs), corresponding to 77 trajectories (i.e., the same mutation identified at 3 or more timepoints) and 38 events (i.e., the same mutation identified at only 1 or 2 timepoints). **(b)** Trajectories were present in 37 individuals, while 3 individuals without trajectories were excluded. **(c)** We next selected the trajectory with the highest variant allele frequency (VAF) at any timepoint in each individual, leaving 37 trajectories in 37 individuals. **(d)** Finally, we excluded individuals in which the selected trajectory was shrinking, leaving 32 trajectories in 32 individuals for analysis.

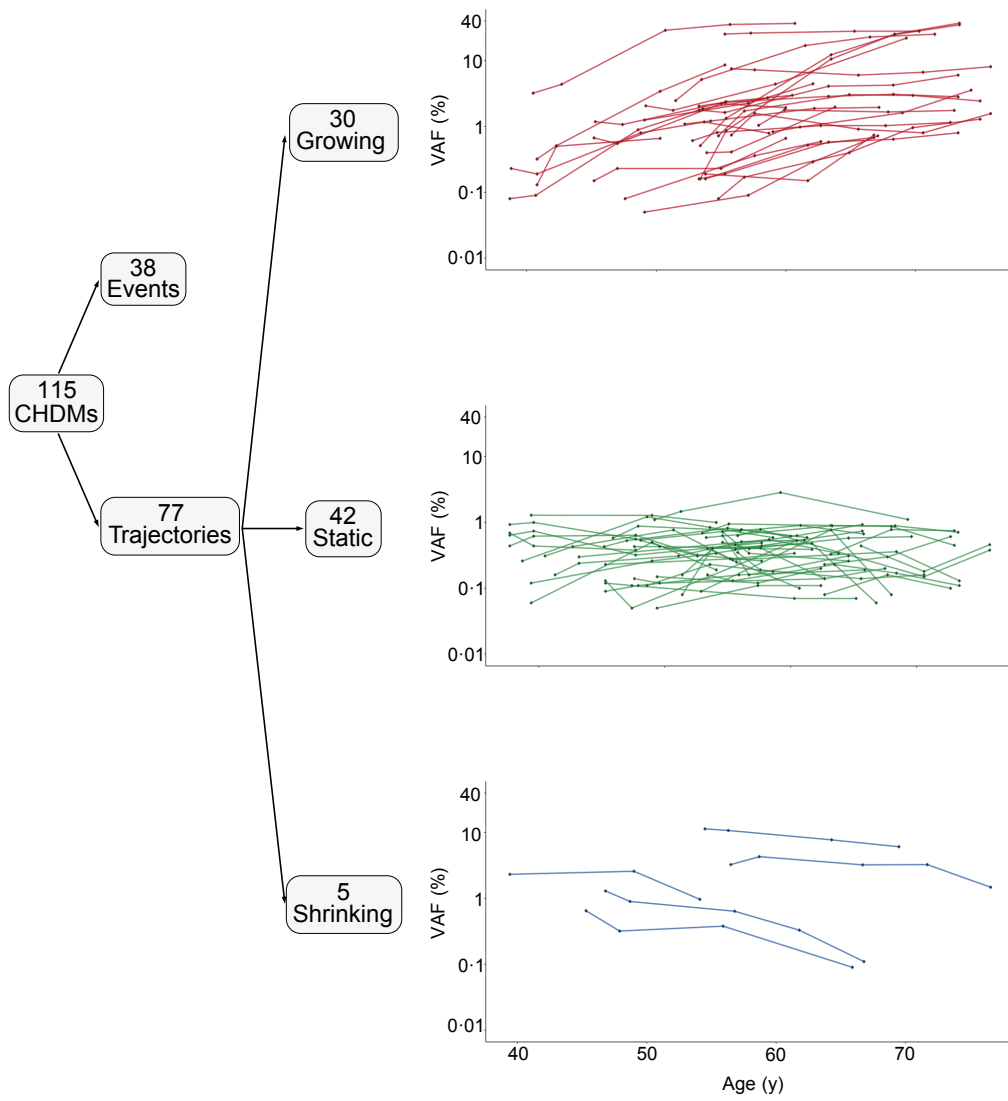

**Figure S3: Categorisation of CHDMs over 20 years.** Categorisation of CHDMs into events (occurring only once or twice) and trajectories. Trajectories are further categorised into growing, static and shrinking, and their VAFs over time are shown.

### Supplemental References

1. Acuna-Hidalgo R, Sengul H, Steehouwer M, van de Vorst M, Vermeulen SH, Kiemeneij L, Veltman JA, Gilissen C, Hoischen A. Ultra-sensitive Sequencing Identifies High Prevalence of Clonal Hematopoiesis-Associated Mutations throughout Adult Life. *Am J Hum Genet* 2017;101:50-64
2. Bray GA, Kim KK, Wilding JPH, World Obesity F. Obesity: a chronic relapsing progressive disease process. A position statement of the World Obesity Federation. *Obes Rev* 2017;18:715- 723
3. Li H, Durbin R. Fast and accurate short read alignment with Burrows-Wheeler transform. *Bioinformatics* 2009;25:1754-1760
4. Eijkelenboom A, Kamping EJ, Kastner-van Raaij AW, Hendriks-Cornelissen SJ, Neveling K, Kuiper RP, Hoischen A, Nelen MR, Ligtenberg MJ, Tops BB. Reliable Next-Generation Sequencing of Formalin-Fixed, Paraffin-Embedded Tissue Using Single Molecule Tags. *J Mol Diagn* 2016;18:851-863
5. Weren RD, Mensenkamp AR, Simons M, Eijkelenboom A, Sie AS, Ouchene H, van Asseldonk M, Gomez-Garcia EB, Blok MJ, de Hullu JA, Nelen MR, Hoischen A, Bulten J, Tops BB, Hoogerbrugge N, Ligtenberg MJ. Novel BRCA1 and BRCA2 Tumor Test as Basis for Treatment Decisions and Referral for Genetic Counselling of Patients with Ovarian Carcinomas. *Hum Mutat* 2017;38:226-235
6. Li H, Handsaker B, Wysoker A, Fennell T, Ruan J, Homer N, Marth G, Abecasis G, Durbin R, Genome Project Data Processing S. The Sequence Alignment/Map format and SAMtools. *Bioinformatics* 2009;25:2078-2079
7. Hiatt JB, Pritchard CC, Salipante SJ, O'Roak BJ, Shendure J. Single molecule molecular inversion probes for targeted, high-accuracy detection of low-frequency variation. *Genome Res* 2013;23:843-854
